# Supplementary material for: Two entry tunnels in mouse TAAR9 suggest the possibility of multi-entry tunnels in olfactory receptors
Source: PubMed Central journal article supplement (PMC8854740; doi:10.1038/s41598-022-06591-z), 2022-02-17
Supplement: 41598_2022_6591_MOESM1_ESM.pdf [file 41598_2022_6591_MOESM1_ESM.pdf]

## Supplementary Information

### Two entry tunnels in mouse TAAR9 suggest the possibility of multi-entry tunnels in olfactory receptors

Authors: ZhengRong Xu<sup>1,2,3,4,‡</sup>, LingNa Guo<sup>2,3,6,‡</sup>, XiaoYun Qian<sup>1,4,‡</sup>, ChenJie Yu<sup>1,4,‡</sup>, ShengJu Li<sup>2,3</sup>, ChengWen Zhu<sup>1,4</sup>, XiaoFeng Ma<sup>1,4</sup>, Hui Li<sup>1,4</sup>, GuangJie Zhu<sup>1,4</sup>, Han Zhou<sup>1,4</sup>, WenXuan Dai<sup>2,3,\*</sup>, Qian Li<sup>2,3,5,\*</sup> & Xia Gao<sup>1,4,\*</sup>

Correspondence to: xiagaogao@hotmail.com; liqian@shsmu.edu.cn;  
518710910026@shsmu.edu.cn

This PDF file includes:

Supplementary Figure S1. TAAR9 has a higher level of conservation in intra-receptor interaction with TAAR5 than with  $\beta$ 2AR.

Supplementary Figure S2. 21 tunnels of TAAR9 predicted by MOLE2.5.

Supplementary Figure S3. Responses of additional TAAR9 mutants to other TAAR9 ligands.

Supplementary Figure S4. Conservation of residues along two tunnels of TAAR9 in aminergic receptors.

Supplementary Figure S5. Binding poses of spermine predicted by multistep induced-fit docking.

Supplementary Figure S6. Binding poses of cadaverine predicted by multistep induced-fit docking.

Supplementary Figure S7. Binding poses of 1-(2-aminoethyl)piperidine predicted by multistep induced-fit docking.

Supplementary Figure S8. Most of the residues within 5 Å of the orthosteric binding pocket of four ligands are in common.

Supplementary Figure S9. Mutations of residues in vestibular binding pockets lead to changes of ligand recognition.

Supplementary Figure S10. Analysis of cell-surface expression by FACS.

Supplementary Figure S11. Elimination of negative charge of some glutamate residues in ECL2 of TAAR9 decreases its ligand binding efficacy.

Table S1. Residues in the 21 tunnels predicted by MOLE2.5.

Table S2. Residues around two tunnels.

Table S3. Values of properties of two tunnels offered by MOLE website.

Table S4. Locations and features of 17 residues specific to each tunnel.

Supplementary Data. Amino acid sequences of 50 mouse aminergic receptors.

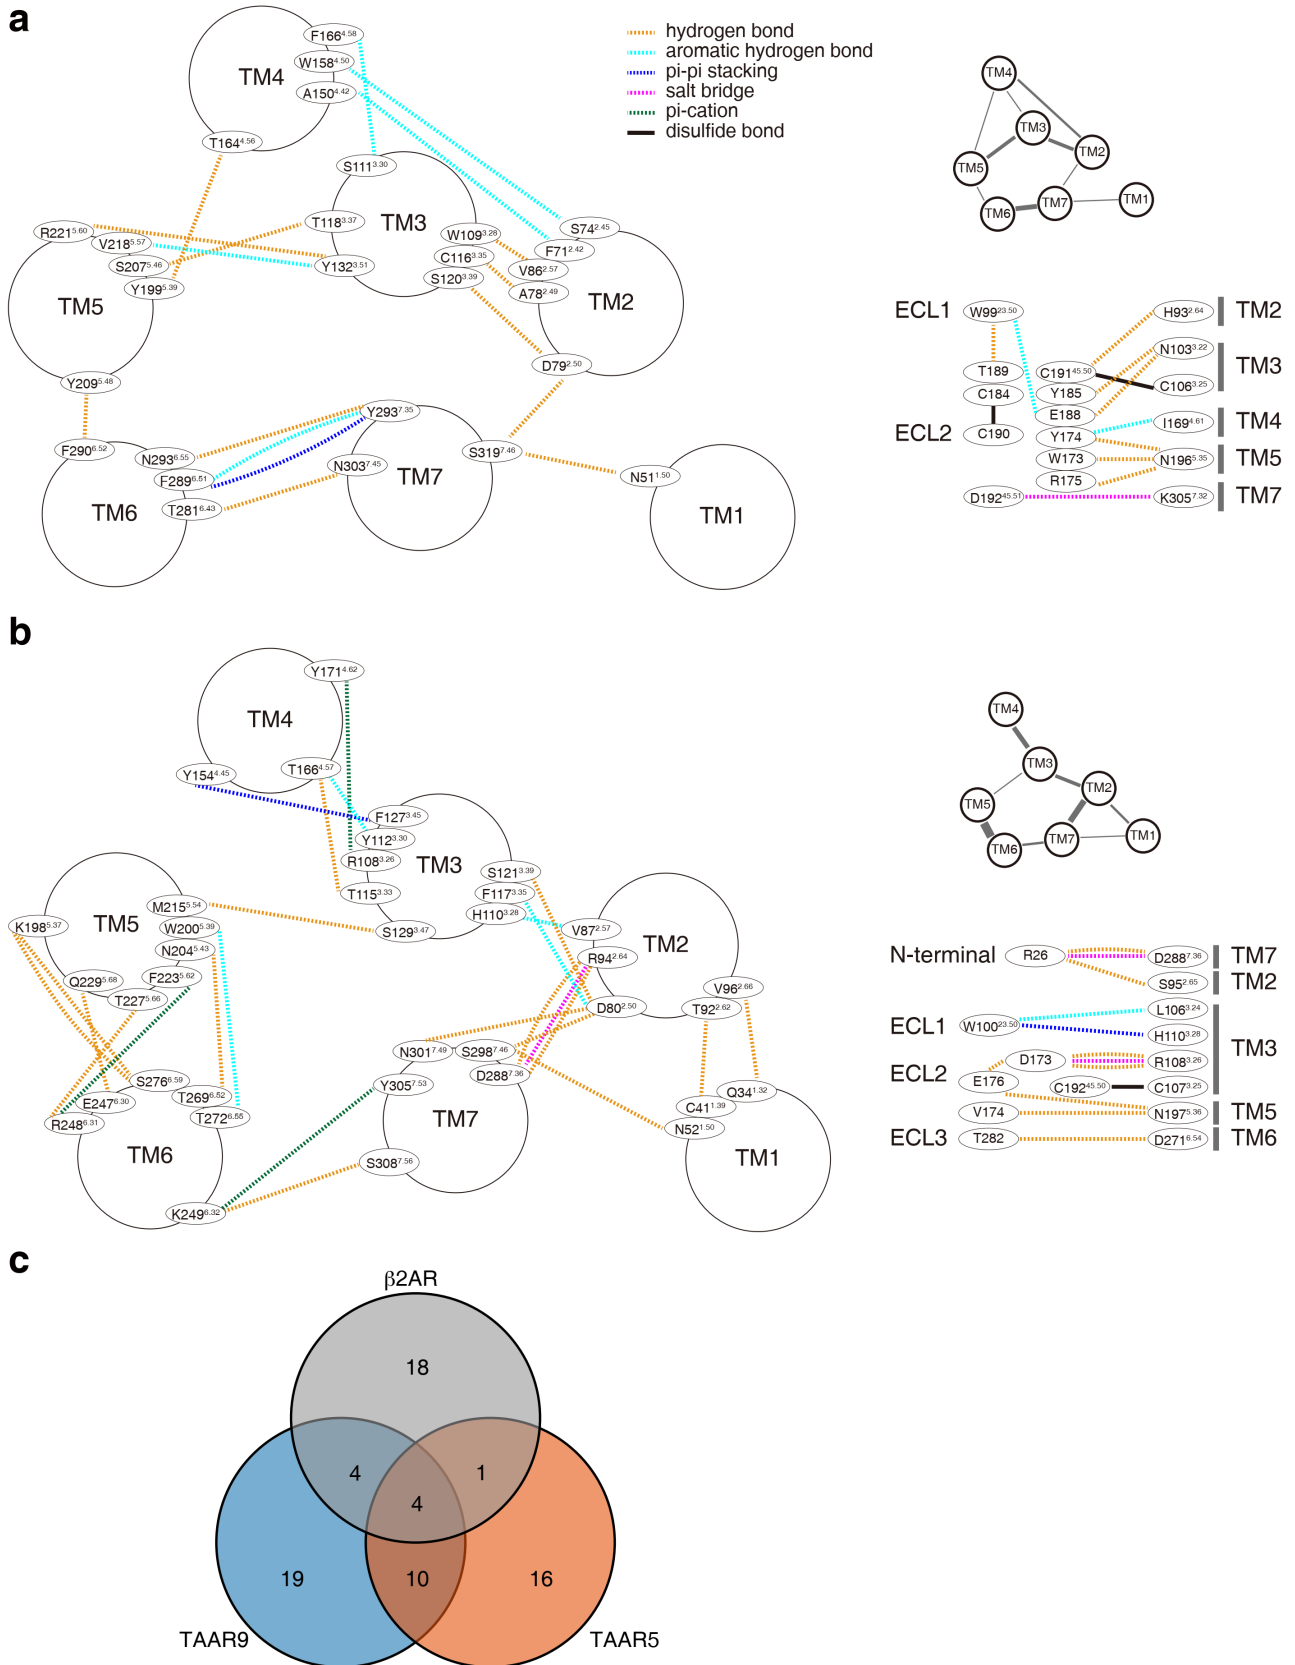

Supplementary Figure S1. TAAR9 has a higher level of conservation in intra-receptor

**interaction with TAAR5 than with  $\beta$ 2AR.** (a) Inter-helical non-covalent interactions and interactions with ECLs in  $\beta$ 2AR. The similar overall inter-helical interaction pattern in  $\beta$ 2AR comparing with that in TAAR9, without interactions between TM1 and TM2. Residues interacting with extracellular domains located in TM2, 3, 4, 5, 7 of  $\beta$ 2AR, and TM1, 2, 3, 5, 6 of TAAR9. (b) Inter-helical non-covalent interactions and interactions with ECLs in TAAR5. Apart from interactions that same as Fig. 1b, pi-cation interaction (green) also exists. TM4 only interact with TM3 in TAAR5, while it interacts with TM2, 3, 5 in TAAR9. Other interaction patterns within TMs are analogous with TAAR9. Residues in TM7 interact with extracellular domains in TAAR5 instead of residues in TM1 in TAAR9. (c) The level of conservation in intra-receptor interactions among TAAR5, TAAR9, and  $\beta$ 2AR. 4 common interactions are present among these three receptors. In addition, other 10 interactions common in TAAR5 and TAAR9, 4 common in TAAR9 and  $\beta$ 2AR, 1 common in TAAR5 and  $\beta$ 2AR are observed. TAAR9, TAAR5, and  $\beta$ 2AR have 18, 19, and 16 specific interactions, respectively.

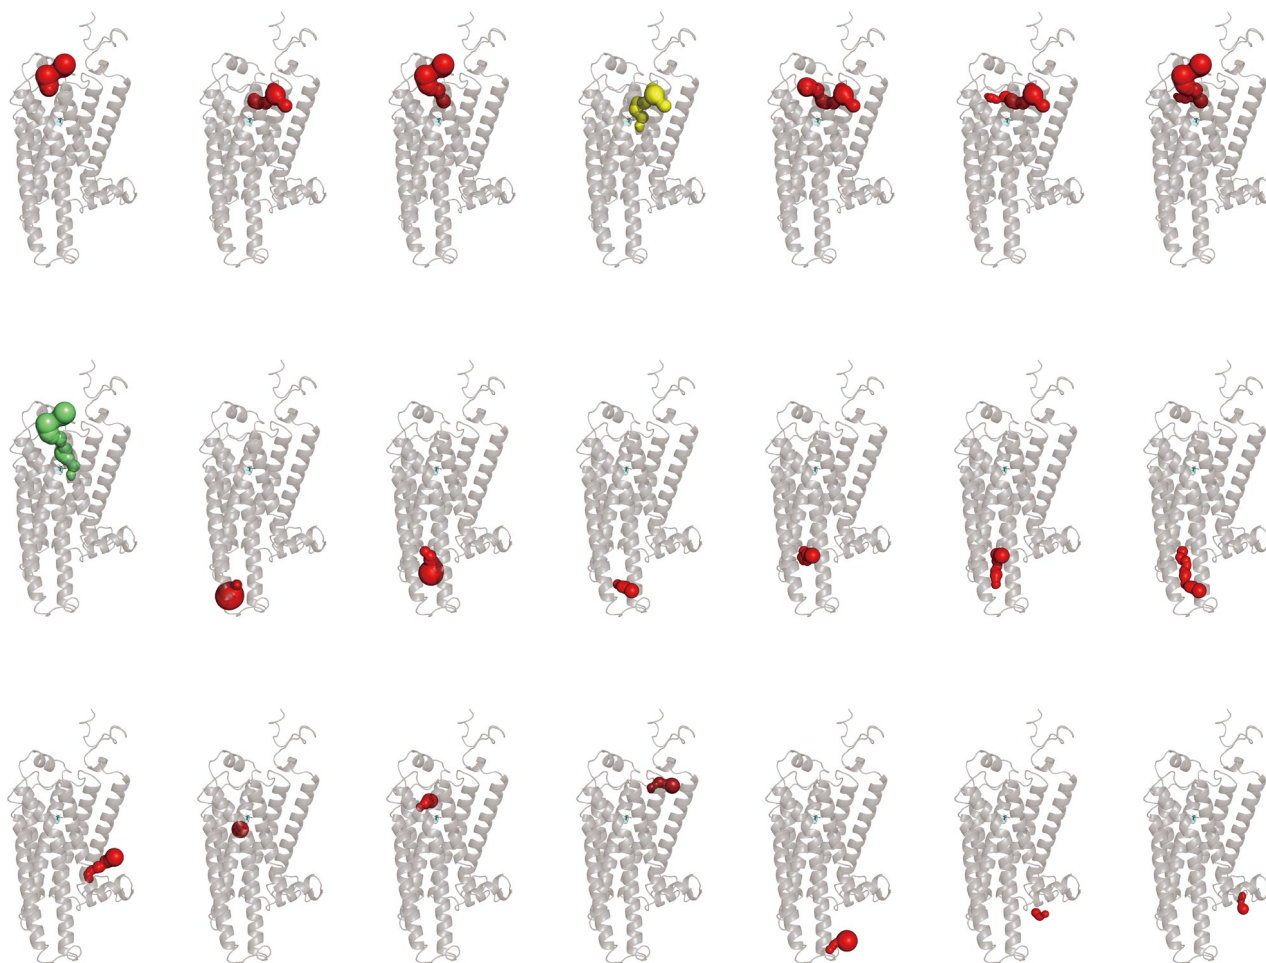

**Supplementary Figure S2. 21 tunnels of TAAR9 predicted by MOLE2.5.** We applied MOLE2.5 to explore intra-receptor space in TAAR9 and retrieved a result of 21 tunnels (red, green, yellow). We examined these tunnels in detail and found two tunnels which are open to the extracellular space and reach the orthosteric binding sites (blue). We named them Tunnel 1 (green) and Tunnel 2 (yellow), respectively.

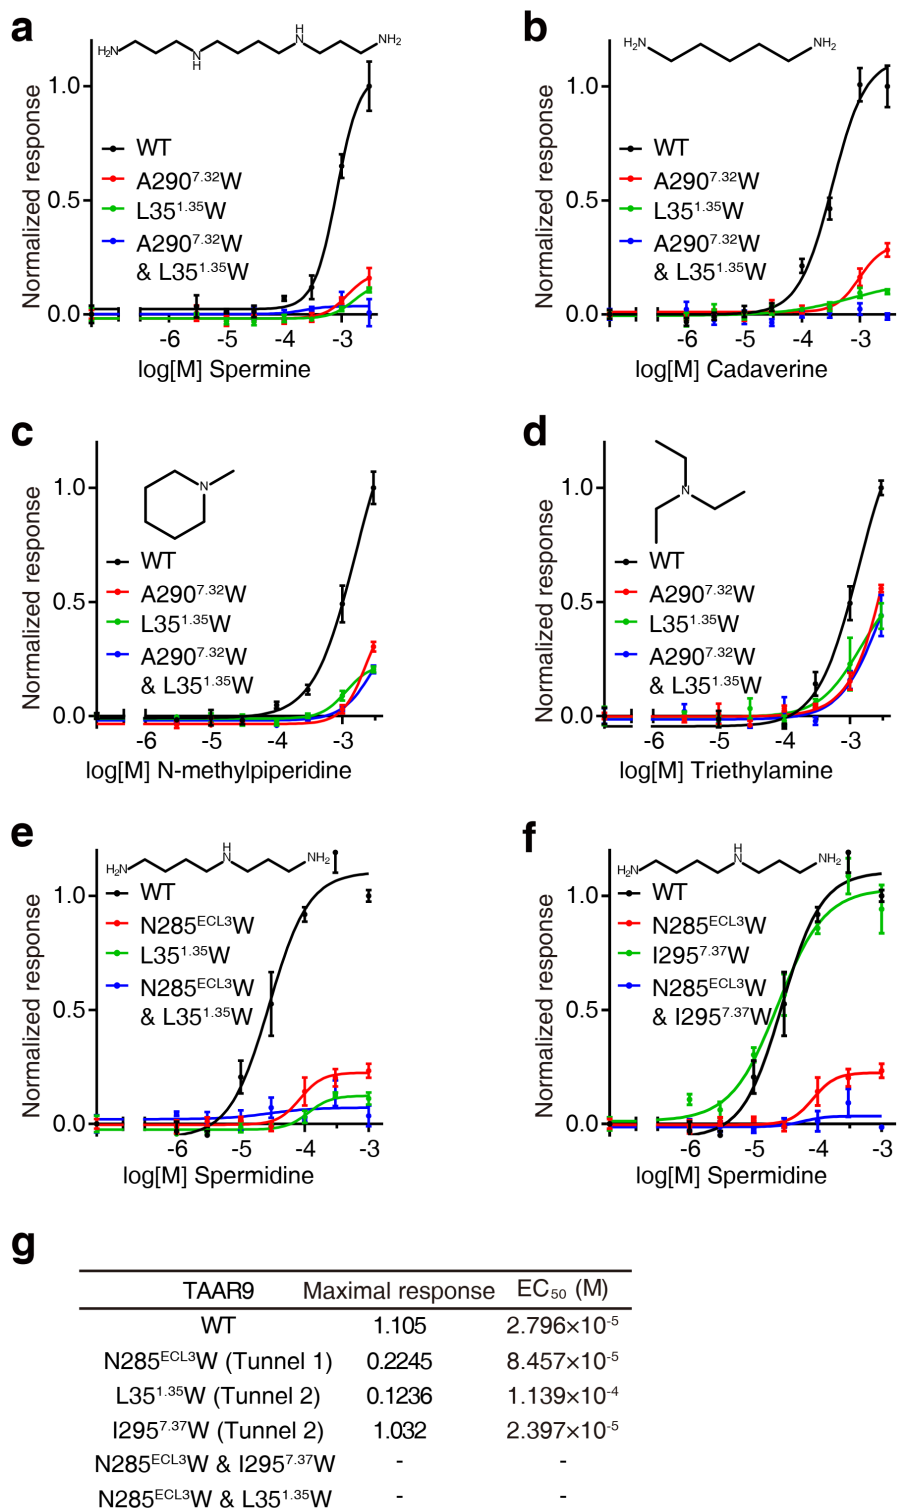

**Supplementary Figure S3. Responses of additional TAAR9 mutants to other TAAR9 ligands.**

(a-d) Dose-dependent response curves of WT, A290<sup>7.32</sup>W single mutant, L35<sup>1.35</sup>W single mutant, and A290<sup>7.32</sup>W & L35<sup>1.35</sup>W double mutant TAAR9 to four ligands, including spermine (a), cadaverine (b), N-methylpiperidine (c), and triethylamine (d). (e) Dose-dependent response curves of WT, N285<sup>ECL3</sup>W

single mutant, L35<sup>1.35</sup>W single mutant, and N285<sup>ECL3</sup>W & L35<sup>1.35</sup>W double mutant TAAR9 to spermidine. (f) Dose-dependent response curves of WT, N285<sup>ECL3</sup>W single mutant, I295<sup>7.37</sup>W single mutant, and N285<sup>ECL3</sup>W & I295<sup>7.37</sup>W double mutant TAAR9 to spermidine. (h) Summary of maximal responses and EC<sub>50</sub> values of the single mutant of Tunnel 1 (N285<sup>ECL3</sup>W), two single mutants of Tunnel 2 (L35<sup>1.35</sup>W and I295<sup>7.37</sup>W), and two double mutants (N285<sup>ECL3</sup>W & I295<sup>7.37</sup>W and N285<sup>ECL3</sup>W & L35<sup>1.35</sup>W).

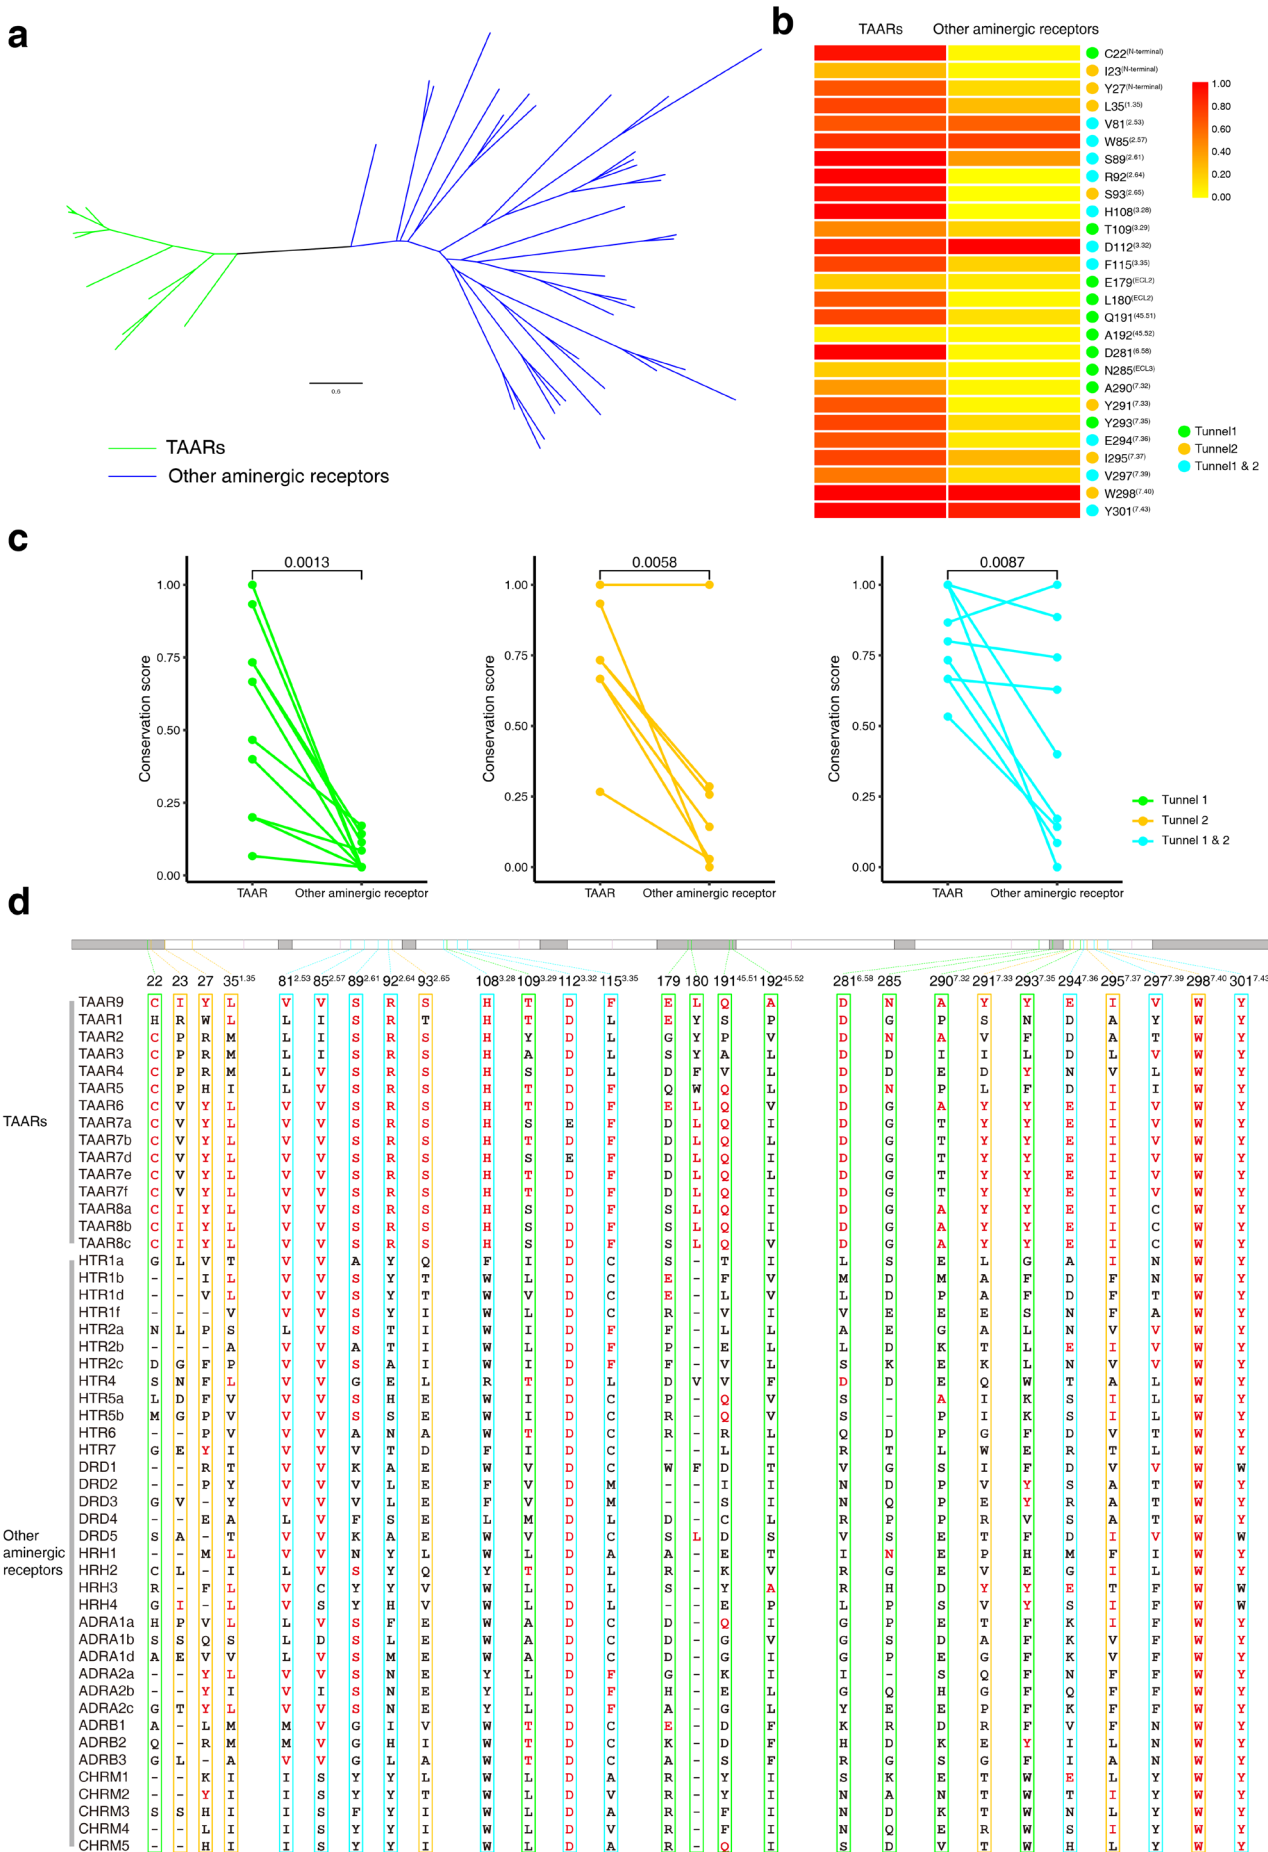



**Supplementary Figure S4. Conservation of residues along two tunnels of TAAR9 in aminergic receptors.** (a) Radical layout of phylogenetic tree of 50 aminergic receptors. TAAR family is clearly delineated from other aminergic receptors. (b) Conservation of 27 residues along two tunnels of TAAR9 among TAAR family and other aminergic receptors. The level of conservation of a specific site was calculated by the ratio of receptor having this site to the total number of receptors. (c) Pairwise comparison of conservation between TAAR and other aminergic receptors. Residues specific to Tunnel 1 and Tunnel 2 or common to two tunnels all show significant differences ( $p < 0.05$ ) between TAAR and other aminergic receptors. (d) Details of all 27 residues in each receptor. These residues are more conserved in TAARs than in other receptors, except for D<sup>3.32</sup>, W<sup>7.40</sup>, and Y<sup>7.43</sup>. Some residues are specific in TAARs, such as R<sup>2.64</sup>, S<sup>2.65</sup>, and H<sup>3.28</sup>.

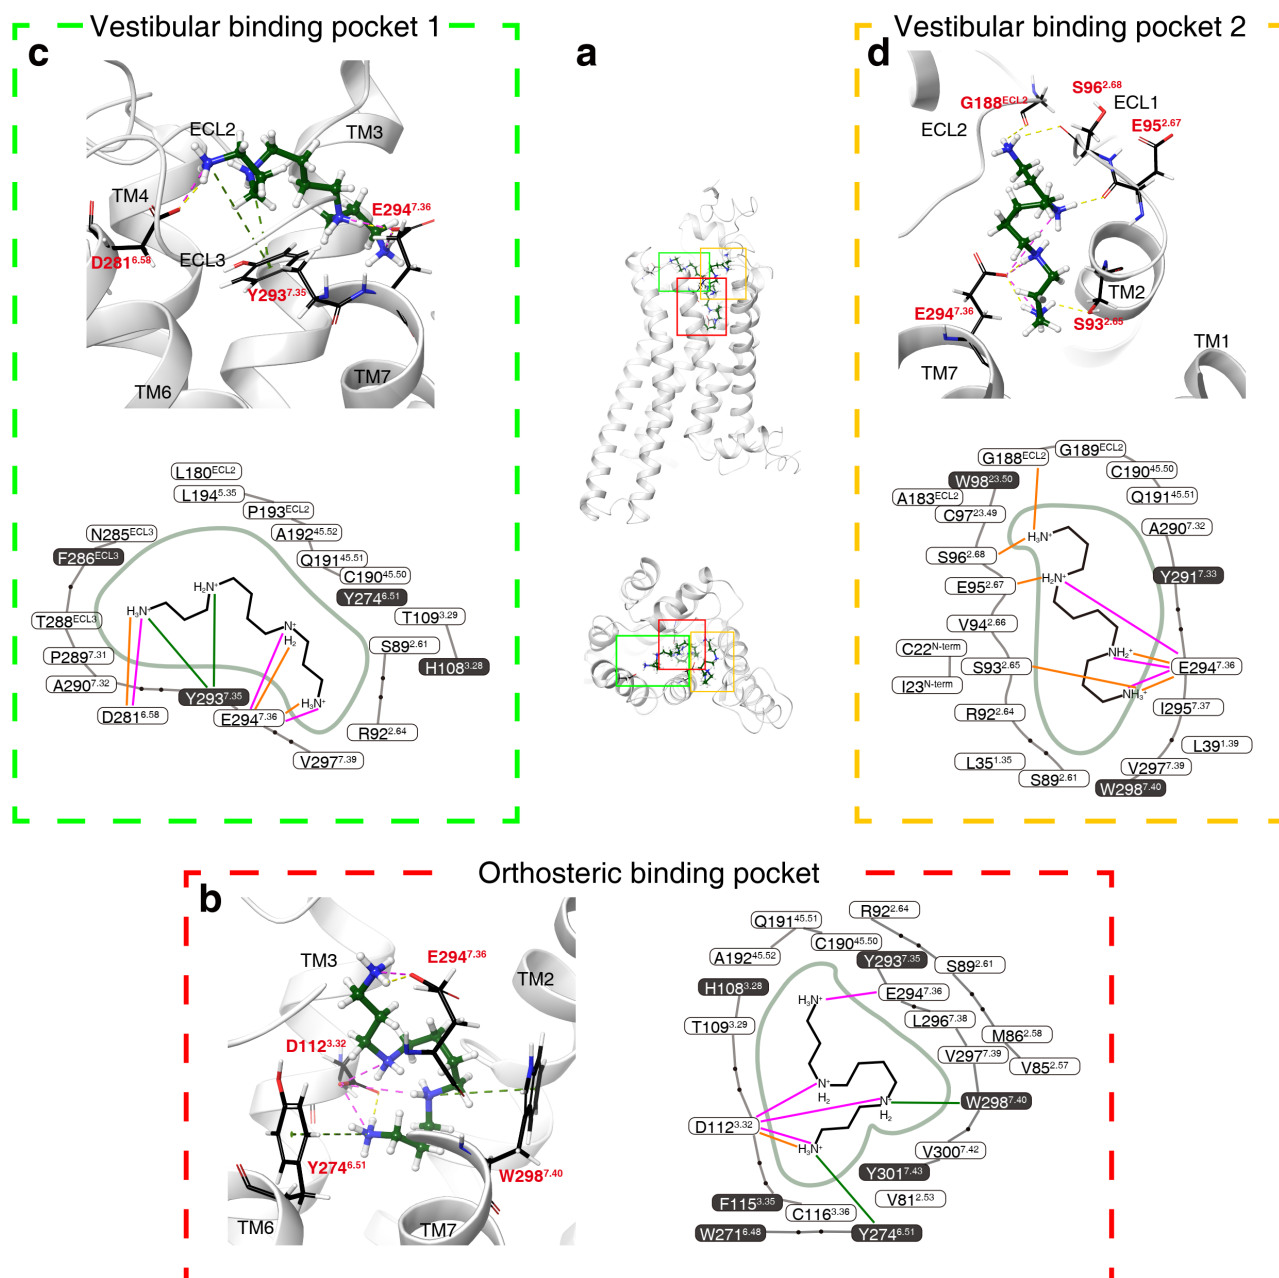

**Supplementary Figure S5. Binding poses of spermine predicted by multistep induced-fit docking.** (a) Docking of another TAAR9 ligand, spermine, into the receptor revealed three similar binding pockets as those described in Fig. 4a. (b) Spermine forms non-covalent bonds with residues in the orthosteric binding pocket in a similar pattern to spermidine. All binding sites of spermidine are involved in binding of spermine. (c) Spermine can also be docked into vestibular binding pocket 1 and forms salt bridge with D281<sup>6,58</sup>. 16 residues surrounding spermidine in vestibular binding pocket 1 are also observed in the docking posture of spermine. (d) Spermine can also be docked into vestibular binding pocket 2, interacting with E294<sup>7,36</sup>, S93<sup>2,65</sup>, S96<sup>2,68</sup>, and G188 in ECL2. Those residues are

also observed to function as binding sites of spermidine in vestibular binding pocket 2. The only difference is that the extracellular residue, E95<sup>2.67</sup>, instead of Q191<sup>45.51</sup> in ECL2 is observed in spermine binding. 23 residues of vestibular binding pocket 2 are within 5 Å range of spermine, that include all 19 residues within 5 Å range of spermidine.

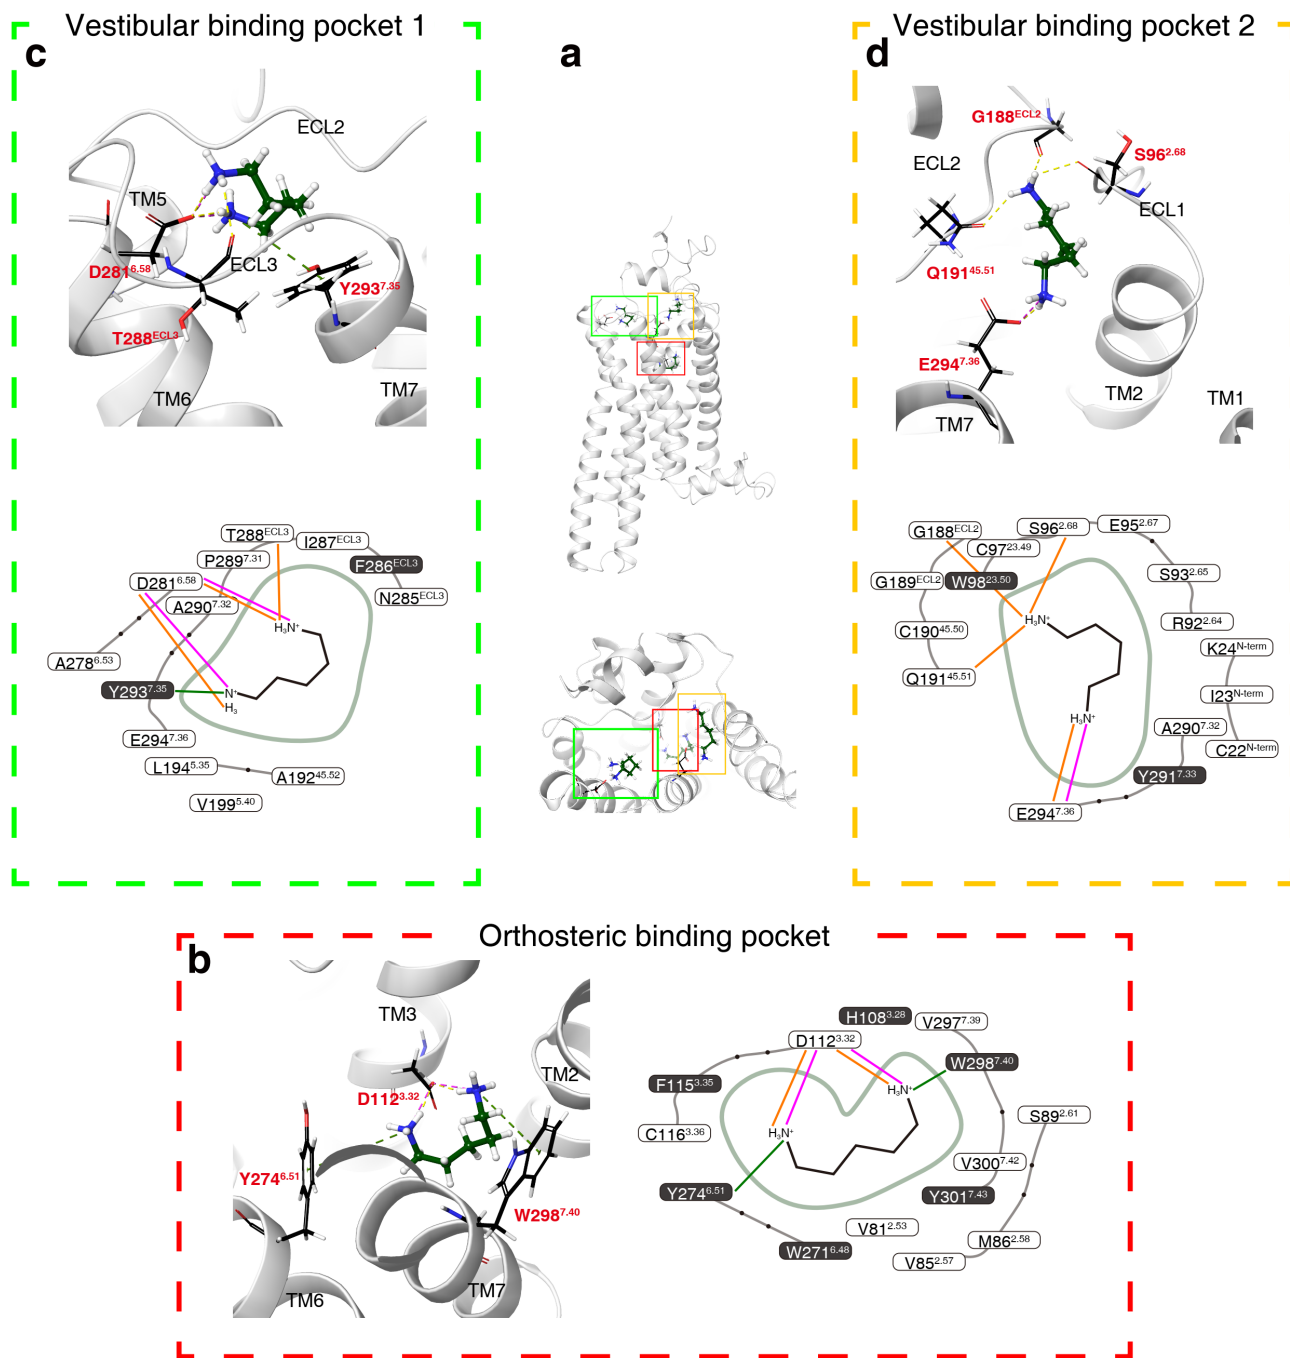

**Supplementary Figure S6. Binding poses of cadaverine predicted by multistep induced-fit docking.** (a) Cadaverine, another TAAR9 ligand, was also docked into three similar binding pockets as those described in Fig. 4a. (b) Cadaverine binding pose in the orthosteric binding pocket is similar to spermidine and spermine. Cadaverine can interact with D112<sup>3.32</sup>, but not with E294<sup>7.36</sup>. Except for Y293<sup>7.35</sup>, other residues with aromatic rings which are within 5 Å range of spermidine also exist in docking result of cadaverine. 13 of 14 residues within 5 Å range of cadaverine are the same as those

in the docking of spermidine. (c) Cadaverine can form salt bridges and hydrogen bonds with D281<sup>6.58</sup> in vestibular binding pocket 1. Other interactive residues in TAAR9 including Y293<sup>7.35</sup> and T288 in ECL3 are also found in docking of spermidine. 11 of 13 residues located within 5 Å range of cadaverine are the same as spermidine in vestibular binding pocket 1. (d) Cadaverine can also bind to E294<sup>7.36</sup> in vestibular binding pocket 2. Hydrogen bonds with three residues, S96<sup>2.68</sup>, G188 in ECL2, and Q191<sup>45.51</sup> in ECL2, that are observed in docking results of cadaverine also exist in the docking results of spermidine. 14 of 16 residues located within 5 Å range of cadaverine are observed in docking of spermidine in vestibular binding pocket 2.

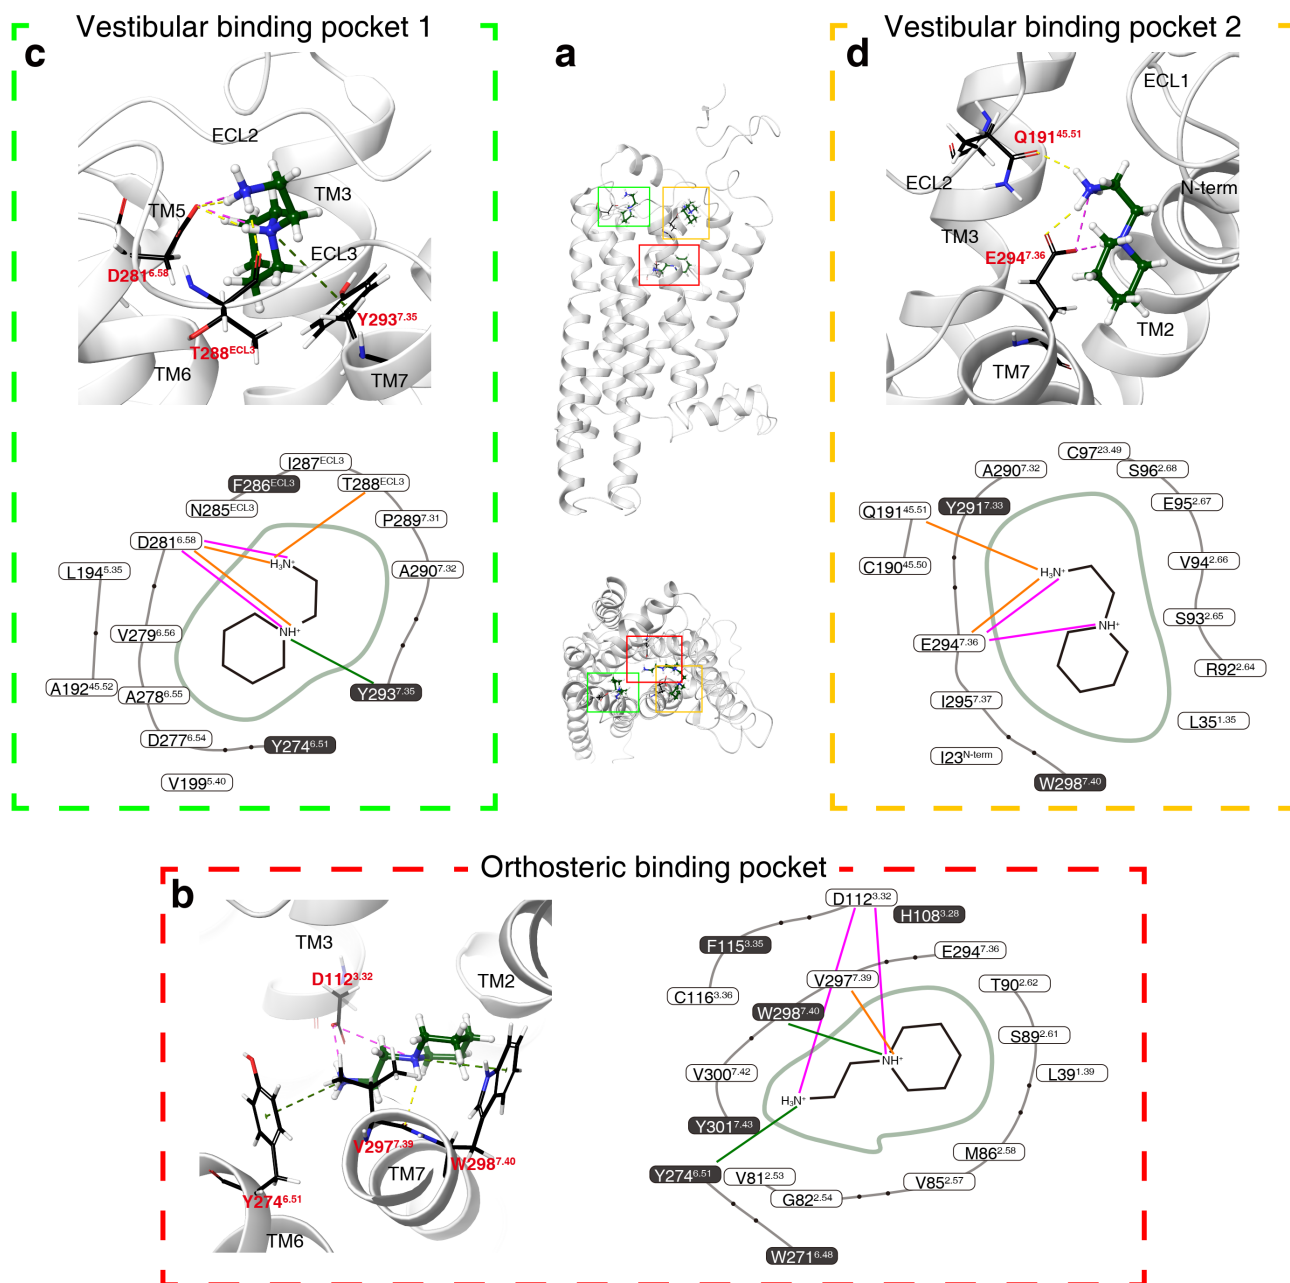

**Supplementary Figure S7. Binding poses of 1-(2-aminoethyl)piperidine predicted by multistep induced-fit docking. (a)** Docking of 1-(2-aminoethyl)piperidine into TAAR9 shows three similar binding pockets as those described in Fig. 4a. **(b)** 1-(2-aminoethyl)piperidine can be docked to orthosteric binding pocket which is in common with cadaverine. Another residue, V297<sup>7,39</sup>, was also noted to function in binding 1-(2-aminoethyl)piperidine. 14 of 18 residues located within 5 Å range of 1-(2-aminoethyl)piperidine are the same as those in the docking of spermidine. **(c)** 1-(2-aminoethyl)piperidine can interact with D281<sup>6,58</sup>, Y293<sup>7,35</sup>, and T288 in ECL3 in vestibular binding pocket 1. Another aromatic ring, Y274<sup>6,51</sup>, which is not observed in docking result of spermidine, exist

in that of 1-(2-aminoethyl)piperidine. 15 residues are located within 5 Å range of 1-(2-aminoethyl)piperidine in vestibular binding pocket 1. **(d)** 1-(2-aminoethyl)piperidine can bind to E294<sup>7,36</sup> in vestibular binding pocket 2. It can also form hydrogen bond with Q191<sup>45,51</sup> in ECL2. All of the 15 residues located within 5 Å range of 1-(2-aminoethyl)piperidine in vestibular binding pocket 2 are the same as those in the docking of spermidine.

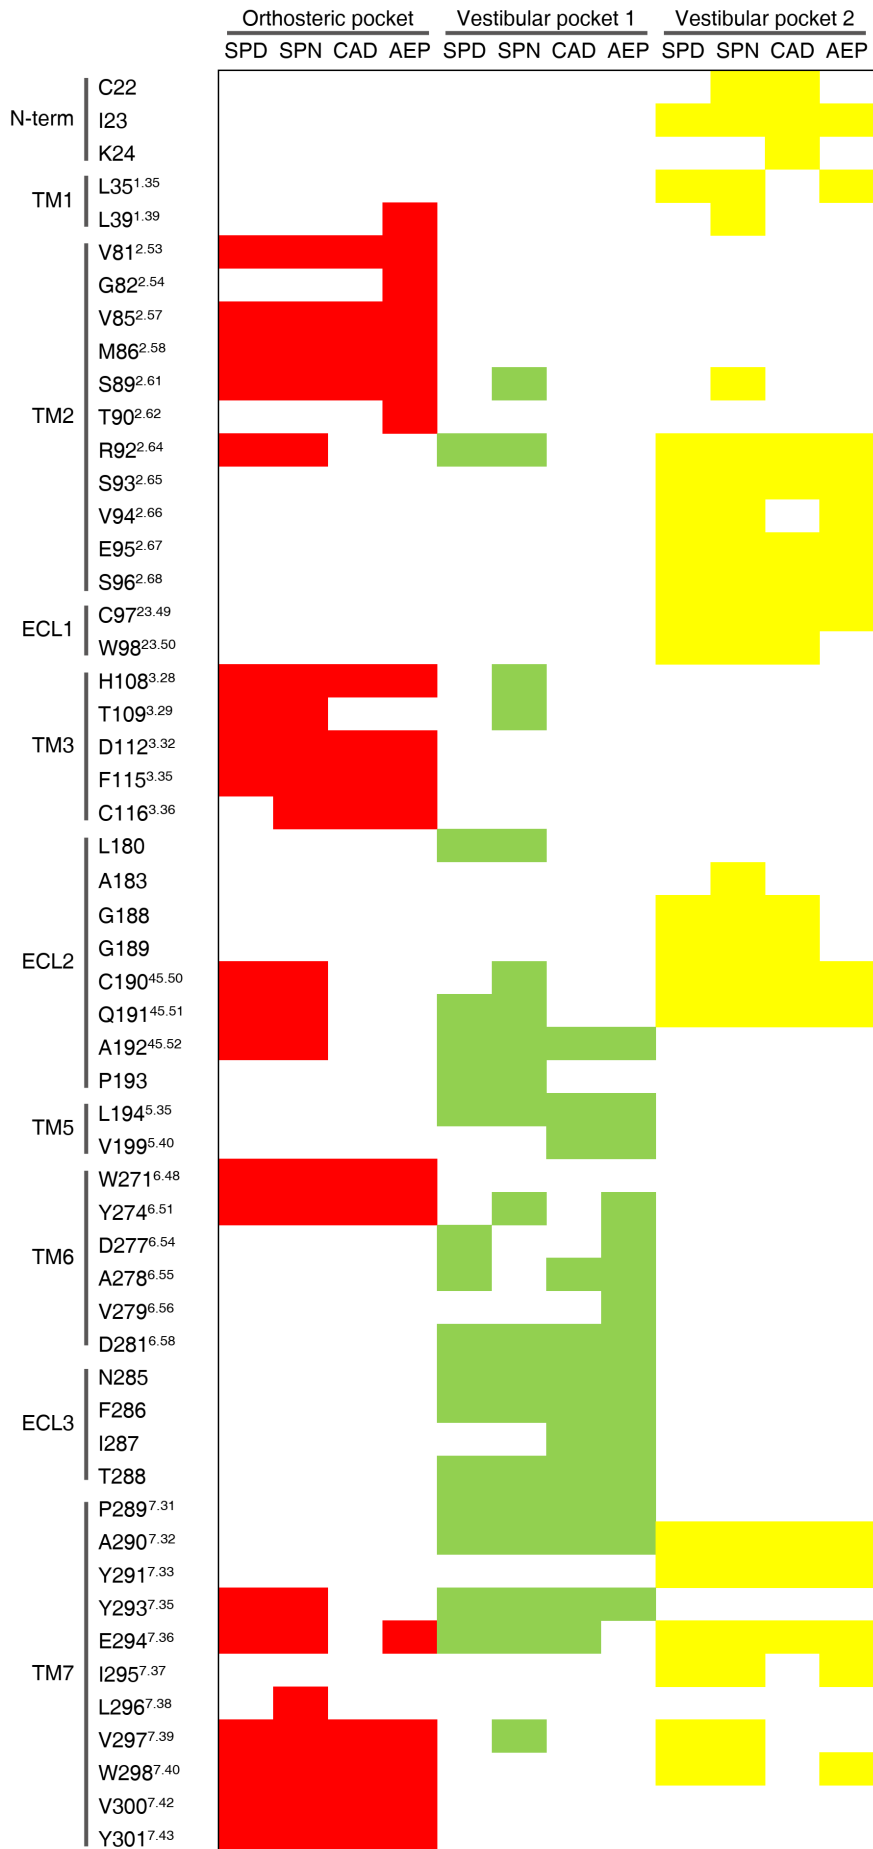



**Supplementary Figure S8. Most of the residues within 5 Å of the orthosteric binding pocket of four ligands are in common.** Presence of the critical residues within 5 Å of the orthosteric binding pocket (red), vestibular pocket 1 (green), and vestibular pocket 2 (yellow) are shown from the docking results of four TAAR9 ligands. 13 residues in the orthosteric binding pocket are among docking results of four ligands are in common. C116<sup>3.36</sup> and E294<sup>7.36</sup> are common among docking results of three ligands. These 15 residues are defined as the residues constituting the orthosteric binding pocket. 6 residues, including R92<sup>2.64</sup> and 3 residues in ECL2, are common in spermidine and spermine docking results. Other 4 residues are specific for one ligand docking. In vestibular binding pocket 1, the numbers of residues common for docking results of 4 ligands, 3 ligands, 2 ligands, and 1 ligand are 9, 2, 9, and 5. Hence, there are 11 residues considered as the residues constituting vestibular binding pocket 1. In vestibular binding pocket 2, the numbers of residues common for docking results of 4 ligands, 3 ligands, 2 ligands, and 1 ligand are 11, 7, 2, and 4. Hence, there are 18 residues considered as the residues constituting vestibular binding pocket 2. SPD, spermidine; SPN, spermine; CAD, cadaverine; AEP, 1-(2-aminoethyl)piperidine.

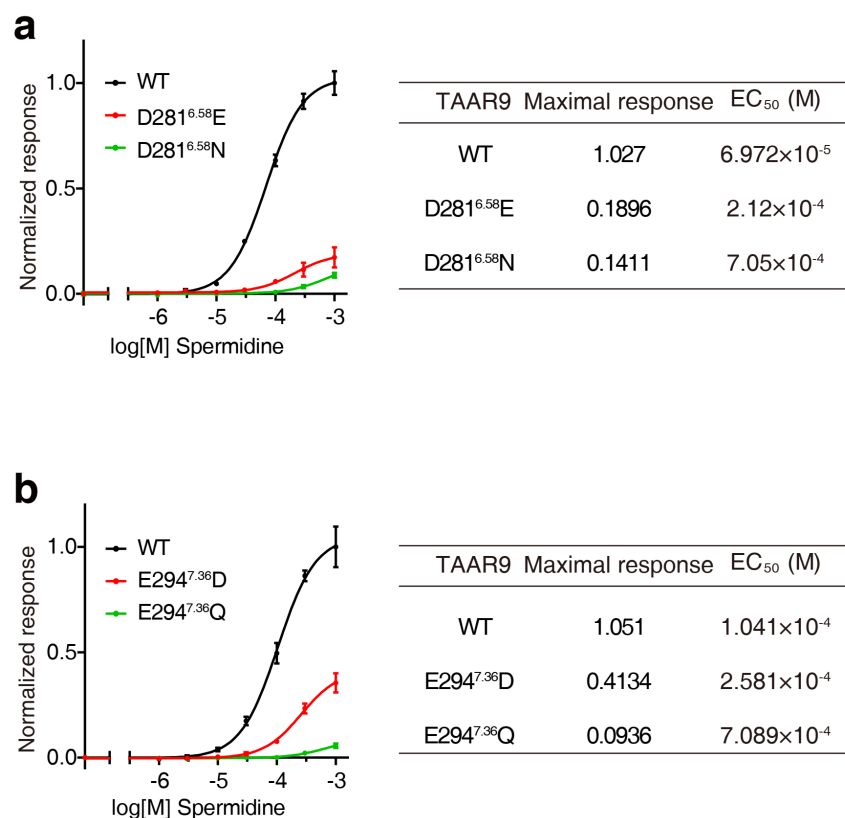

**Supplementary Figure S9. Mutations of residues in vestibular binding pockets lead to changes of ligand recognition.** (a) Maximal responses and EC<sub>50</sub> values of mutations in D281<sup>6.58</sup> in Fig. 4e. The D281<sup>6.58</sup>E mutant shows lower response compared with WT TAAR9, but larger response compared with the D281<sup>6.58</sup>N. (b) Maximal response and EC<sub>50</sub> values of mutations in E294<sup>7.36</sup> in Fig. 4g. The E294<sup>7.36</sup>D mutant shows less than 3-fold decreased response compared with WT. However, little response can be observed for E294<sup>7.36</sup>Q mutant.

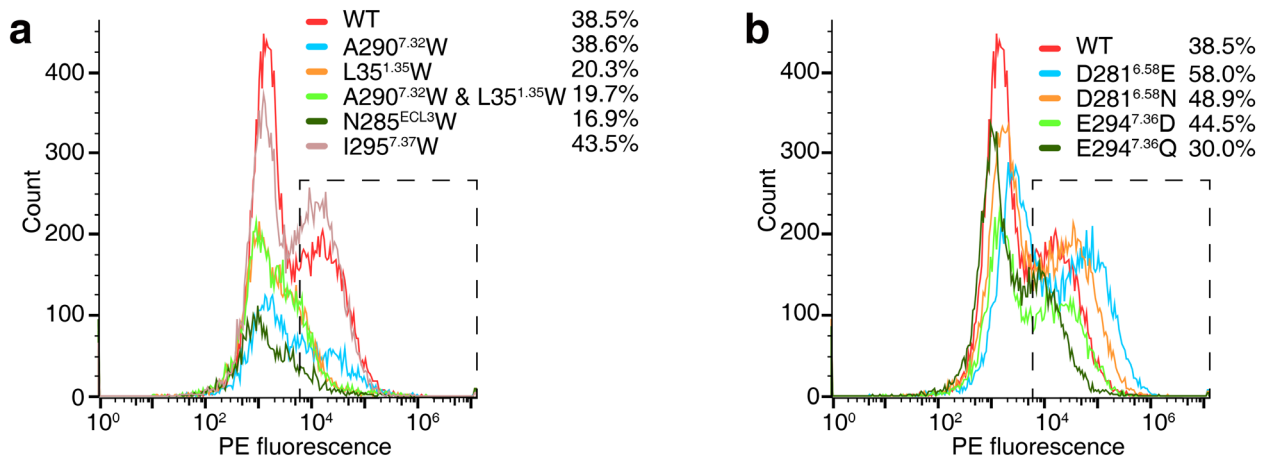

**Supplementary Figure S10. Analysis of cell-surface expression by FACS.** Hana3A cells expressing WT or mutant TAAR9 with EGFP. WT and mutant TAAR9 receptors have Rho tag in their N-terminus, which can be used for surface labeling. The receptors expressed on the cell surface are marked by dotted box, and the percentages of receptors on the cell surface are labeled on the corner. **(a)** The A290<sup>7.32</sup>W and I295<sup>7.37</sup>W mutants have similar cell-surface expression levels compared to WT. The L35<sup>1.35</sup>W, A290<sup>7.32</sup>W & L35<sup>1.35</sup>W, and N285<sup>ECL3</sup>W mutants show slightly decreased cell-surface expression levels to WT. **(b)** The D281<sup>6.58</sup>E, D281<sup>6.58</sup>N, and E294<sup>7.36</sup>D mutants show increased cell-surface expression levels to WT, while the E294<sup>7.36</sup>Q mutant shows slightly decreased cell-surface expression levels to WT.

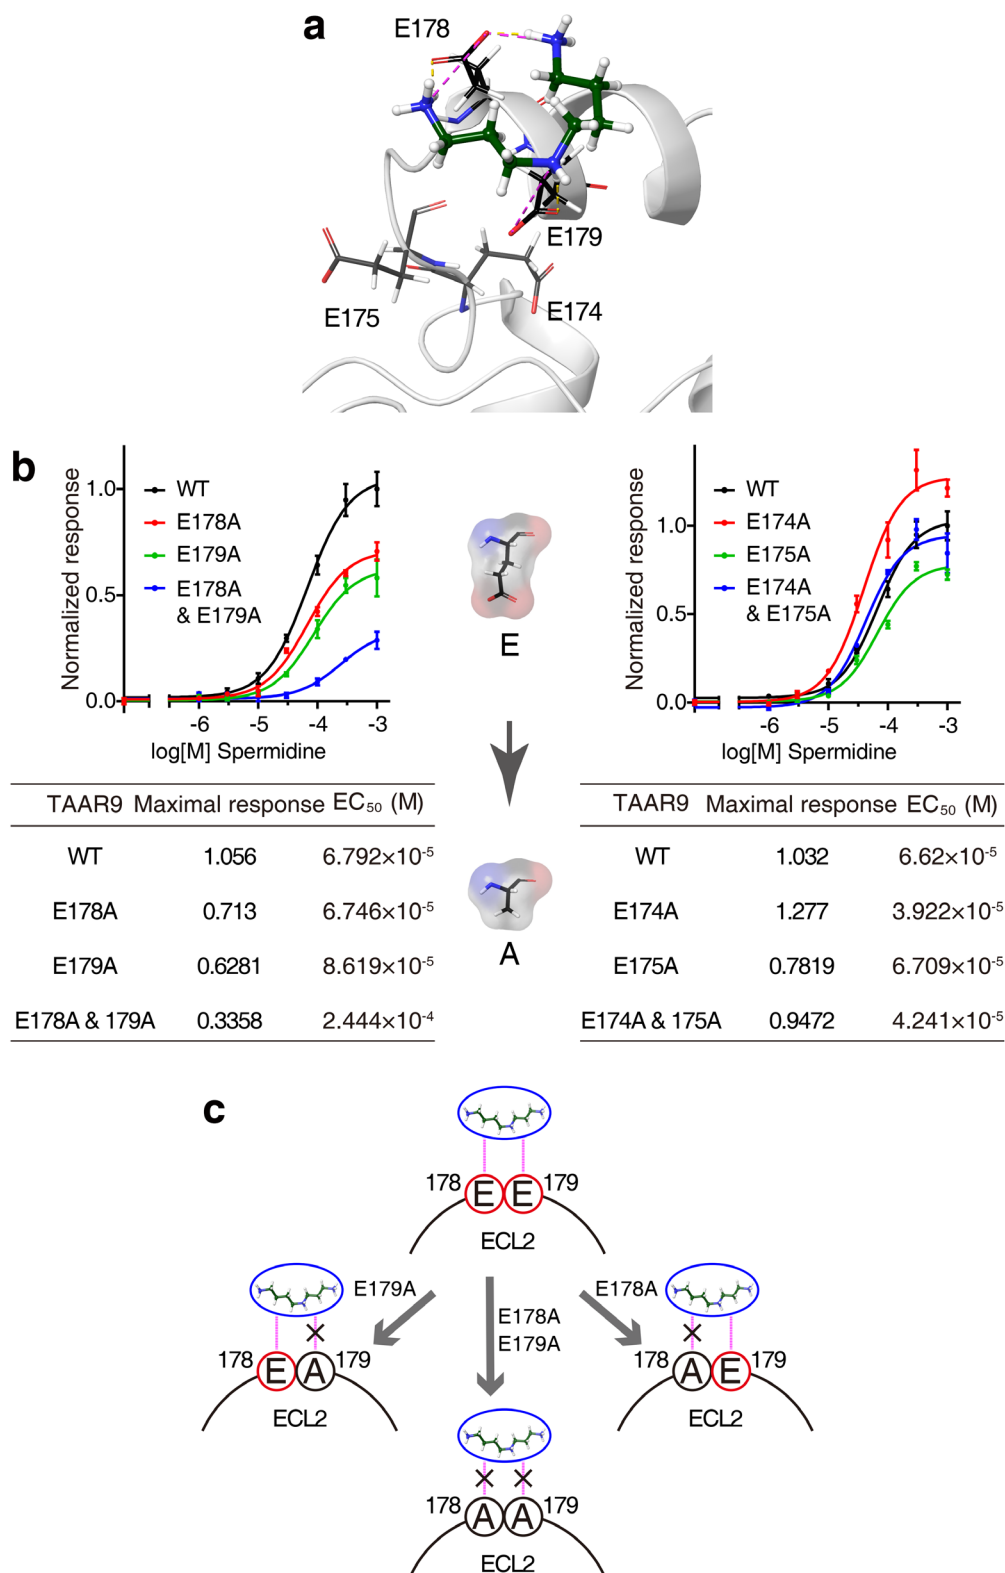

**Supplementary Figure S11. Elimination of negative charge of some glutamate residues in ECL2 of TAAR9 decreases its ligand binding efficacy. (a)** Two pairs of adjacent glutamates are present in ECL2. E178 and E179 in ECL2 are observed to interact with spermidine in the docking

model. **(b)** E178 and E179 were mutated to A (left) separately or simultaneously. Single mutants show slightly decreased responses but similar  $EC_{50}$ . However, double mutant gives rise to a much lower maximal response and larger  $EC_{50}$ . E174 and E175 were mutated to A (right) separately or simultaneously. All of the three mutants show comparable maximal responses and  $EC_{50}$  with wild type TAAR9. **(c)** Schematic illustration of ligand binding to ECL2 of TAAR9. Both of E178 and E179 can bind to spermidine through salt bridge and recruit the ligand to the tunnels. Elimination of any glutamate can be compensated by the other one.

| Tunnel number                    | Lining residues                                                                                                   |
|----------------------------------|-------------------------------------------------------------------------------------------------------------------|
| predicted tunnel 1               | C22, E179, L180, Q191, A192, L194, D281, N285, A290, Y293                                                         |
| predicted tunnel 2               | I23, Y27, L35, S89, R92, S93, H108, C190, A192, Y291, E294, I295, V297, W298                                      |
| predicted tunnel 3               | C22, R92, H108, E179, L180, C190, Q191, A192, D281, N285, A290, Y293, E294, V297                                  |
| predicted tunnel 4<br>(Tunnel 2) | I23, Y27, L35, V81, V85, S89, R92, S93, H108, D112, F115, Y291, E294, I295, V297, W298, Y301                      |
| predicted tunnel 5               | I23, Y27, L35, S89, R92, S93, H108, Q191, A192, L194, D281, A290, Y291, Y293, E294, I295, V297, W298              |
| predicted tunnel 6               | I23, Y27, L35, S89, R92, S93, H108, T109, F168, N173, C190, Q191, A192, P193, W198, Y291, E294, I295, V297, W298  |
| predicted tunnel 7               | C22, R92, H108, T109, F168, N173, E179, L180, C190, Q191, A192, P193, W198, D281, N285, A290, Y293, E294, V297    |
| predicted tunnel 8<br>(Tunnel 1) | C22, V81, V85, S89, R92, H108, T109, D112, F115, E179, L180, Q191, A192, D281, N285, A290, Y293, E294, V297, Y301 |
| predicted tunnel 9               | L138, Q227, K230, I231, K246, V249, A250                                                                          |
| predicted tunnel 10              | R130, A133, V134, P137, Y140, I220, V249, E253, A256, A257                                                        |
| predicted tunnel 11              | Q227, A228, I231, E232, S241, E247, A250, R254                                                                    |
| predicted tunnel 12              | R130, V134, I220, F221, A224, E253, R254, A257, K258                                                              |
| predicted tunnel 13              | F221, A224, Q227, A228, I231, A250, E253, R254, A257, K258,                                                       |
| predicted tunnel 14              | R130, V134, I220, A224, Q227, A228, I231, E232, S241, E247, A250, E253, R254, A257                                |
| predicted tunnel 15              | L45, F48, G49, L52, V53, P308, L309, Y311, A312, F318, I322                                                       |
| predicted tunnel 16              | F111, S114, W157, V161                                                                                            |
| predicted tunnel 17              | S103, K106, F107, C110, F165, F168, Y169,                                                                         |
| predicted tunnel 18              | V91, R92, V94, E95, W98, Y99, F100,                                                                               |
| predicted tunnel 19              | S241, S242, E243, S244, E247, R248, K251,                                                                         |
| predicted tunnel 20              | Q62, W317, K320                                                                                                   |
| predicted tunnel 21              | K320, A321, L324, T338, A345, G346                                                                                |

**Table S1. Residues in the 21 tunnels predicted by MOLE2.5.** The lining residues around 21 predicted tunnels are listed in the same order as the Supplementary Fig. S2 online. Only predicted tunnel 4 (named Tunnel2) and predicted tunnel 8 (named Tunnel1) pass through D112<sup>3,32</sup>.

| Location | Tunnel 1              | Tunnel 2             |
|----------|-----------------------|----------------------|
|          | C22                   |                      |
| N-term   |                       | I23<br>Y27           |
| TM1      |                       | L35 <sup>1.35</sup>  |
|          | V81 <sup>2.53</sup>   | V81 <sup>2.53</sup>  |
|          | V85 <sup>2.57</sup>   | V85 <sup>2.57</sup>  |
| TM2      | S89 <sup>2.61</sup>   | S89 <sup>2.61</sup>  |
|          | R92 <sup>2.64</sup>   | R92 <sup>2.64</sup>  |
|          |                       | S93 <sup>2.65</sup>  |
|          | H108 <sup>3.28</sup>  | H108 <sup>3.28</sup> |
|          | T109 <sup>3.29</sup>  |                      |
| TM3      | D112 <sup>3.32</sup>  | D112 <sup>3.32</sup> |
|          | F115 <sup>3.35</sup>  | F115 <sup>3.35</sup> |
|          | E179                  |                      |
|          | L180                  |                      |
| ECL2     | Q191 <sup>45.51</sup> |                      |
|          | A192 <sup>45.52</sup> |                      |
| TM6      | D281 <sup>6.58</sup>  |                      |
| ECL3     | N285                  |                      |
|          | A290 <sup>7.32</sup>  |                      |
|          |                       | Y291 <sup>7.33</sup> |
|          | Y293 <sup>7.35</sup>  |                      |
|          | E294 <sup>7.36</sup>  | E294 <sup>7.36</sup> |
| TM7      |                       | I295 <sup>7.37</sup> |
|          | V297 <sup>7.39</sup>  | V297 <sup>7.39</sup> |
|          |                       | W298 <sup>7.40</sup> |
|          | Y301 <sup>7.43</sup>  | Y301 <sup>7.43</sup> |

**Table S2. Residues around two tunnels.** The specific location of residues around Tunnel 1 and Tunnel 2 are listed in order. Residues in TM2, TM3, TM7 account for most composition.

| Property       | Value    |          |
|----------------|----------|----------|
|                | Tunnel 1 | Tunnel 2 |
| Length (Å)     | 35.9     | 32.9     |
| Bottleneck (Å) | 1.3      | 1.3      |
| Hydropathy     | -0.4     | -0.13    |
| Charge         | -3       | -1       |
| Polarity       | 14.76    | 16.45    |
| Mutability     | 82       | 79       |
| Ionizable      | 5        | 3        |

**Table S3. Values of properties of two tunnels offered by MOLE website.** Both tunnels show similar properties in length, bottleneck, polarity, mutability. Tunnel 1 is more hydrophilic than Tunnel 2. The number of ionizable residues of Tunnel 1 and Tunnel 2 is 5 and 3, respectively, which leads to a more negative charge of Tunnel 1. Length, length of the tunnel. Bottleneck, radius of the narrowest neck of the tunnel. Hydropathy, average of hydropathy index per each amino acid. Polarity, average of lining amino acid polarities using statistical methods by Zimmermann et al<sup>1</sup>. Mutability, average of relative mutability index based on empirical substitution matrices between similar protein sequences<sup>2</sup>. Ionizable, number of ionizable residues

- 1 Zimmerman, J. M., Eliezer, N. & Simha, R. The characterization of amino acid sequences in proteins by statistical methods. *J Theor Biol* **21**, 170-201, doi:10.1016/0022-5193(68)90069-6 (1968).
- 2 Jones, D. T., Taylor, W. R. & Thornton, J. M. The rapid generation of mutation data matrices from protein sequences. *Comput Appl Biosci* **8**, 275-282, doi:10.1093/bioinformatics/8.3.275 (1992).



| Location | Tunnel 1              | Tunnel 2             | Properties of the residues                                              |
|----------|-----------------------|----------------------|-------------------------------------------------------------------------|
| N-term   | C22                   |                      | In dynamic N terminal                                                   |
|          |                       | I23                  | In dynamic N terminal                                                   |
|          |                       | Y27                  | In dynamic N terminal                                                   |
| TM1      |                       | L35 <sup>1.35</sup>  | -                                                                       |
| TM2      |                       | S93 <sup>2.65</sup>  | Interacting with R32 <sup>1.32</sup> forming hydrogen bond              |
| TM3      | T109 <sup>3.29</sup>  |                      | Around orthosteric binding pocket                                       |
| ECL2     | E179                  |                      | In dynamic ECL2                                                         |
|          | L180                  |                      | In dynamic ECL2                                                         |
|          | Q191 <sup>45.51</sup> |                      | In ECL2 and around orthosteric binding pocket                           |
|          | A192 <sup>45.52</sup> |                      | In ECL2 and around orthosteric binding pocket                           |
| TM6      | D281 <sup>6.58</sup>  |                      | Negative charged                                                        |
| ECL3     | N285                  |                      | In ECL3 but near TM6                                                    |
| TM7      | A290 <sup>7.32</sup>  |                      | -                                                                       |
|          |                       | Y291 <sup>7.33</sup> | Steric hindrance is already high                                        |
|          | Y293 <sup>7.35</sup>  |                      | Steric hindrance is already high, and around orthosteric binding pocket |
|          |                       | I295 <sup>7.37</sup> | -                                                                       |
|          |                       | W298 <sup>7.40</sup> | Steric hindrance is already high, and around orthosteric binding pocket |

**Table S4. Locations and features of 17 residues specific to each tunnel.** Eight of the specific residues are located in dynamic extracellular regions. Five of them are near orthosteric binding pocket. S93<sup>2.65</sup> is involved in the intra-receptor interaction. D281<sup>6.58</sup> is negatively-charged. Y291<sup>7.33</sup>, Y293<sup>7.35</sup>, and W298<sup>7.40</sup> have high steric hindrance. Therefore, the above-mentioned residues were not selected for mutagenesis study. We selected L35<sup>1.35</sup>, A290<sup>7.32</sup>, and I295<sup>7.37</sup> to generate TAAR9 mutants. Besides, N285 in ECL3 was also selected as it is near TM6 and its position is relatively fixed.

**Supplementary Data. Amino acid sequences of 50 mouse aminergic receptors.**

50 aminergic receptor protein sequences retrieved from NCBI are presented in Fasta format. Accession numbers are added after abbreviation of the receptors in the unique sequence identifier.

>MmTaar1-NP\_444435.1

MHLCHAITNISHRNSDWSREVQASLYSLMSLILATLVGNLIVIIISISHFKQLHTPTNWLLHSMIAI  
VDFLLGCLIMPCSMVRTVERCWYFGEILCKVHTSTDIMLSSASIFHLAFISIDRYCAVCDPLRY  
KAKINISTILVMILVSWSLPAVYAFGMIFLELNLKGVEELYRSQVSDLGGCSPFFSKVSGVLAF  
MTSFYIPGSVMLFVYYRIYFIAKQGARSINRTNVQVGLGKSKAPQSKETKAAKTLGIMVGVF  
LVCWCPPFLCTVLDPFLGYVIPPDLNDALYWFGYLNALNPMVYAFFYPWFRRALKMVLLGK  
IFQKDSSRSKLFL

>MmTaar2-NP\_001007267.1

MASFEAQQETFDCSEYGNNGSCPENERSLGVRAAMYSLMACAIFITIFGNLAMIISISYFKQLHT  
PTNLLILSMAVTDVLLGFTIMPYSMVRSENCWYFGLTFCKIHYSFDLMLSITSIFHLCSVAVD  
RFYAICHPLHYCTKMTIPVVRLLLLVCWSVPGAFAGVVFSEAYADGIEGYDILVACSSSCPV  
MFNKLWGTTLFVAGFFTPSSMMVGIYKIFAVSKKHARVIDNLPENQNNQMRKDKKAAKTL  
GIVMGVFLLCWFPCFFTILLDPFLNFSTPAVLFDALTWFGYFNSTCNPLIYGGFFYPWFRRALK  
YILLGKIFSSHFNHTNLFTQKETE

>MmTaar3-NP\_001008429.1

MDLIYIPEDLSSCPKFGNKSCPPTNRSFRVRMIMYLFMTGAMVITIFGNLVIIISISHFKQLHSPT  
NFLILSMATTDVLLGFVIMPYSMVRSENCWYFGDSFCKFHASFDMMLSLTSIFHLCSIAIDRF  
YAVCDPLHYTTTMTVSMIKRLLAFCWAAPALFSFGLVLSEANVSGMQSYEILVACFNFCALTF  
NKFVGTILFTTCFFTPGSIMVGIYKIFIVSRRHARALSDMPANTKGAVGKNLSKKKDRKAAK  
TLGIVMGVFLACWLPCFLAVLIDPYLDYSTPIIVLDLLVWLGYFNSTCNPLIHGGFFYPWFRKAL  
QFIVSGKIFRSNSDTANLFPEAH

>MmTaar4-NP\_001008499.1

MNTPDPWSSPEVQFCFAAANSSCPKARPALVVCAMYLMIGAVMTMLGNMAVIAHFKQ  
LHSPNLFILSMATTDVLLSCVMPFMSMIRSIESCWYFGDLFCKVHSCDIMLCTTSIFHLCFIS  
VDRHYAVCDPLHYVTQITTRVVGVFLISWSVPIFFAFGLVFSELNLIIGAEDFVAADCTGLCVL  
IFNKLWGVLASFIAFFLPGTVMVGIYIHFIVAQKHARQIGTGPRTKQALSSESKMKATSKKESK  
ATKTLIVMGVFLCWLPFFVLTITDPFIDFTTPEDLYNVFLWLGYFNSTFNPIIYGMFYPWFR  
KALRMIVTGTIFRSDSSTSSLHPAHP

>MmTaar5-NP\_001009574.1

MRAVLLPGSGEQPTAFQYQVNGSCPRTVHPLAIQVVIYLACAVGLITVLGNLFVFAVSFYK  
VLHTPTNLLLLSLALADMLLGLLVLPLSTVRSVESCWFFGDFLCRLHTYLDTLFCLTSIFHLCFI  
SIDRHCAICDPLLYPSKFTVRTALRYIVAGWGIPAAATAFFLYTDVVERALSQWLEEMPCVGS  
CQLLFNKFWGWLNFPAFFVPCIMISLYLKIFVVATRQAQQIRTLQSLSLAVKRRERKAAKTL  
GIAVGIYLCWLPFTVDLVDLSDLLNFITPPLVDFIWFAYFNSACNPIIYVFSYRWFRKALKLLL  
SREIFSPRTPTVDLYHD

>MmTaar6-NP\_001010828.1

MGSNSSPPTVLQLCYENVTGSCVKTPYSPGSRVILYAVFGFGAVLAVFGNLMVMISILHFKQL  
HSPTNFLIASLACADFGVGVISVMPFSMVRSESCWYFGRSFCTFHTCCDVAFCYSSLFHLSFI  
SIDRYIAVTDPLVYPTKFTVSVSGICIGVSWILPLVYSGAVFYTGVDGGLLEELSSALNCVGGC  
QVVVNQNWVLIDFLSFLIPTLVMILYGNIFLVARQQAKKIENIGSKTESSSESYKARVARRERK  
AAKTLGITVAFMISWLPYSIDSLVDAFMGFITPAYIYEICVWCAYYNSAMNPLIYALFYPWFK  
KAIKVMISGQVFKNSSATMNLFSEQI

>MmTaar7a-NP\_001010829.1

MDKLVDFHFLSDQSRTMNEDLFSATSTELCYENLNRSCVRSPYSPGPRILYAVFGFGAALAV  
CGNLLVMTSILHFRQLHSPANFLVSLACADFLVGLTVMPFSTVRSVEGCWYFGEYSYCKFHS  
CFEGSFCYSSIFHLCFISVDRYIAVSDPLTYPTRFTASVSGKCITFSWLLSIIYSFSLLYTGANE  
AGLEDLVSULTCVGGCQIAVNQSWVFINFLLFIPTLVMITVYSKIFLIAKQQAQNIKMSKQT  
ARASESYKDRVAKRRERKAAKTLGIAVAAFLLSWLPYFIDSIIAFLGFITPTYVVEILVWIAYYNS  
AMNPLIYAFFYPWFRKAIKLIVTGKILRENSSTTNLFPE

>MmTaar7b-NP\_001010827.1

MATDNDSPWDQDSILSSDMFSATSTELCYENLNRSCVRSPYSPGPRILYAVFGFGAALAV  
CGNLLVMTSILHFRQLHSPANFLVSLACADFLVGLTVMPFSTVRSVEGCWYFGEYSYCKLHT  
CFDVSFCYCSIFHLCFISVDRYIAVSDPLTYPTRFTAFVSGKCITFSWLLSTIYGFSLLYTGANE  
AGLEDLVSALTCVGGCQLAVNQSWSVFINFLLFIPTLVMITVYSKIFLIAKQQAQNIKMSKQT  
ARASDSYKDRVAKRRERKAAKTLGIAVAAFLLSWLPYFIDSIIAFLGFITPTYVVEILVWIAYYN  
SAMNPLIYAFFYPWFRKAIKLIVSGKVLRENSSTTNLFPE

>MmTaar7d-NP\_001010838.1

MATGDDSPWDQDSILSRDLFSATSTELCYENLNRSCVRSPYSPGPRILYAVFGFGAVLAV  
CGNLLVMTSILHFRQLHSPANFLVSLACADFLVGMVMPFSMVRSEGCWYFGEYSYCKFH  
SCFEGSFCYSSLFHLCFISVDRYIAVSDPLTYPTRFTASVSGKCITFSWLLSIIYSFSLLYTGAN  
DAGLEDLVSALTCVGGCQIAVNQTWVFINFLLFIPTLVMITVYSKIFLIAKQQAQNIKMSKQT  
ARASESYKDRVTKRRERKAAKTLGIAVAAFLLSWLPYFIDSIIAFLGFITPTYVVEILVWIVYYNS  
AMNPLIYAFFYSWFRKAIKLIVSGKILRENSSTTNLFPE

>MmTaar7e-NP\_001010835.1

MATGDDSFLLWDQDSILSRDLFSATS AELCYENLNRSCVRSPYSPGPRLLIYAVFGFGAVLAV  
CGNLLVMTSILHFRQLHSPANFLVASLACADFLVGLTVMPFSTVRSVEGCWYFGEIYCKLHT  
CFDVSFCSSSIFHLCFISVDRYIAVSDPLIYPTFRFTASVSNKCITFSWLLSISYGFSLIYTGASEA  
GLEDLVSALTCVGGCQLAVNQSWVFINFLLFIPTLVMITVYSKIFLIAKQQAQNIEMSKQTA  
RASDSYKDRVAKRERKAAKTLGIAVA AFLSWLPYFIDSFIDAFLGFITPTYVVEILVWIAYYNS  
AMNPLIYAFFYPWFRKAIKLTVTGKILRENSSTTNLFPE

>MmTaar7f-NP\_001010839.1

MSIADETVSWNQDSILSRDLFSATS AELCYENLNRSCVRSPYSPGPRLLIYAVFGFGAVLAVC  
GNLLVMTSILHFRQLHSPANFLVASLACADFLVGMVMPFSMVRSVEGCWYFGDSYCKLHT  
CFDVSFCYCSLFHLCFISVDRYIAVSDPLIYPTFRFTASVSGKICITFSWLLSISYGFSLIYTGASE  
AGLEDLVSSLTCVGGCQIAVNQTWVFINFVFLIPTLVMITVYSKIFLIAKQQAQNIEMSKQTA  
RASDSYKDRVAKRERKAAKTLGIAVA AFLSWLPYFIDSFIDAFLGFITPTYVVEILVWIVYYNS  
AMNPLIYAFFYPWFRKAIKLTVTGKILRENSSTTNLFSE

>MmTaar8a-NP\_001010830.1

MTSNFSQPALQLCYENTNGSCIKTPYSPGPRVILYMVYGFVAVLAVCGNLLVVISVLHFKQLH  
SPANFLIASLASADFLVGISVMPFSMVRSIESCWYFGDAFCSLHSCCDVAFICYSSVLHLCFIS  
VDRYIAVTDPLVYPTKFTVSVSGICISISWILPLVYSSAVFYTGISAKGIESLV SALNCGVGGCQIV  
INQDFVLISFLLFFIPTLVMILYKIFLVAKQQA VKIETSVSGNRGESSSESHKARVAKRERKAA  
KTLGVTVAFMVS WLPTYTIDALVDAFMGFITPAYVVEICCWGTYNSAMNPLIYAFFFPWFKK  
AIKLILSGEILKGHSSTANLFSE

>MmTaar8b-NP\_001010837.1

MTSNFSQPALQLCYENTNGSCIKTPYSPGPRVILYMVYGFVAVLAVCGNLLVVISVLHFKQLH  
SPANFLIASLASADFLVGISVMPFSMVRSIESCWYFGDAFCSLHSCCDVAFICYSSALHLCFIS  
VDRYIAVTDPLVYPTKFTVSVSGICISISWILPLVYSSAVFYTGISAKGIESLV SALNCGVGGCQIV  
VNQDWVLIDFLLFFIPTLVMILYKIFLVAKQQA VKIETSVSDNRGESSSESHKARVAKRERKA  
AKTLGVTVAFMVS WLPTYTIDSLVDAFVGFITPAYVVEICCW SAYYNSAMNPLIYAFFYPWFR  
KAIKLILSGEILKSHSSTMSLFSE

>MmTaar8c-NP\_001010840.1

MTSNFSQPALQLCYENTNGSCIKTPYSPGPRVILYMVYGFVAVLAVCGNLLVVISVLHFKQLH  
SPANFLIASLASADFLVGISVMPFSMVRSIESCWYFGDAFCSLHSCCDVAFICYSSALHLCFIS  
VDRYIAVTDPLVYPTKFTVSVSGICISISWILPLVYSSAVFYTGISAKGIESLV SALNCGVGGCQV  
VVNQDWVLISFLLFFIPTVVMILYKIFLVAKQQA VKIETSVSGNRGESSSESHKARVAKRER  
KAAKTLGVTVAFMVS WLPTYTIDALVDAFMGFITPAYVVEICCW SAYYNSAMNPLIYAFFYPW

FRKAIKLILSGKILKGHSSTTNLFSE

>MmTaar9-NP\_001010831.1

MTSDFSPEPPMELCYENVNGSCIKSSYAPWPRAILYGVLGALLAVFGNLLVIIAILHFKQLH  
TPTNFLVASLACADFLVGVTVMFSTVRSVESCWYFGESYCKFHTCFDTSFCFASLFHLCCI  
SIDRYIAVTDPLTYPTKFTVSVSGLCIALSWFFSVTYSFSIFYTGANEEGIEELVVALTCVGGC  
QAPLNQNWVLLCFLFLPTVVMVFLYGRIFLVAKYQARKIEGTANQAQASSESYKERVAKR  
ERKAAKTLGIAMAAFLVSWLPYIIDAVIDAYMNFITPAYVVEILVWCVYYNSAMNPLIYAFFYP  
WFRKAIKLIVSGKVFRAADSSTTNLFSEEAGAG

>MmHtr1a-NP\_032334.2

MDMFSLGQGNNTTTSLEPFGTGGNDTGLSNVTFSYQVITSLLLGTLIFCAVLGNACVVAIAL  
ERSLQNVANYLIGSLAVTDLMVSVLVLPMAALYQVLNKWTLGQVTCDLFIALDVLCTSSILHL  
CAIALDRYWAITDPIDYVNRTPRRAAALISLTLWIGFLISIPPMLGWRTPEDRSNPNECTISKD  
HGYTIYSTFGAFYIPLLLMLVLYGRIFRAARFRIRKTVKKVEKKGAGTSFGTSSAPPPKSLNG  
QPGSGDCRRSAENRAVGTPCANGAVRQGEDDATLEVIEVHRVGNKSKGHLPLPSESGATSY  
VPACLERKNERTAEAKRKMALARERKTVKTLGIIMGTFILCWLPFFIVALVLPFCESSCHMPEL  
LGAIINWLGYSNLLNPVIYAYFNKDFQNAFKKIIKCKFCR

>MmHtr1b-NP\_034612.1

MEEQGIQCAPPPPAASQTGVPLTNLSHNCSADGYIYQDSIALPWKVLLVALLALITLATTLSNA  
FVIATVYRTRKLHTPANYLIASLAVTDLLVSILVMPISTMYTVTGRWTLGQVVCDFWLSSDITC  
CTASIMHLCVIALDRYWAITDAVEYSKRTPKRAAIMIVLVVFSISISLPPFFWRQAKAEEM  
LDCFVNTDHSVLYTVYSTVGAFYLPULLIYALYGRIVVEARSRLKQTPNKTGKRLTRAQLITDSP  
GSTSSVTSINSRAPDVPSESGSPVYVNQVKVRVSDALLEKKKLMAARERKATKTLGILGAFIV  
CWLPFFIISLVMPICKDACWFHMAIFDFFNWLGYLNSLINPIIYTMSNEDFKQAFHKLIRFKCAG

>MmHtr1d-NP\_001272411.1

MSPPNQSLEGLPQEASNRSLNVTGAWDPEVLQALRISLVVLSVITLATVLSNAFVLTILLTK  
KLHTPANYLIGSLATTDLLVSILVMPISIAYTTRTWNFGQILCDIWWSSDITCCTASILHLCVIAL  
DRYWAITDALEYSKRRTAGHAAAMIAAVWIISICISIPPLFWRQATAHEEMSDCLVNTSQISYTI  
YSTCGAFYIPSILLIYGRIVVAARSRLNPPSLYGKRFTTAQLITGSAGSSLCSLNPSLHESHT  
HTVGSPLFFNQVKIKLADSILERKRISAARERKATKTLGILGAFIICWLPFFVVSLLPICRDSC  
WIHPALDFFTWLGYLNSLINPVIYTVFNEDFRQAFQKVHFRKIS

>MmHtr1f-NP\_032336.1

MDFLNASDQNLTSELLNRMPKILVSLTSLGLALMTTINSLVIAAIVTRKLHHPANYLICSLA  
VTDFLVAVLVMPFSIVYIVRESWIMGQVLCDIWLSVDIICCTCSILHLSAIALDRYRAITDAVEYA  
RKRTPRHAGIMITIVWVISVFISMPLFWRHQGTSRDECEVIKHDHIVSTIYSTFGAFYIPLVLIL

ILYYKIYRAARTLYHKRQASRMIKEELNGQVFLESSEKSIKLVSTSYMLEKSLSDPSTDFDRIH  
STVKSPRSELKHEKSWRRQKISGTRERKAATTLGLILGAFVICWLPFFVKELVVNVCEKCKIS  
EEMSNFLAWLGYLNSLINPLIYTIFNEDFKKAFQKLVRCRY

>MmHtr2a-NP\_766400.1

MEILCEDNISLSSIPNSLMQLGDDSRLYPNDFNSRDANTSEASNWTIDAENRTNLSCEGYLPP  
TCLSILHLQEKNWSALLTTVVIIILTIAGNILVIMAVSLEKKLQATNYFLMSLAIADMLLGFLVMP  
VSMLTILYGYRWPLPSKLCVWYLDVLFSTASIMHLCAISLDRYVAIQNPIHHSRFSRSTKAF  
LKIIAVWTISVIGSMPPIVFGQLQDDSKVFEKGSCLLADDFVLIGSFVAFFIPLTIMVITYFLTIKSL  
QKEATLCVSDLSTRAKLSFSFLPQSSLSSEKLFQRSIHREPGSYAGRRTMQSISNEQKACK  
VLGIVFFLVVMWCPFFITNIMAVICKESCENNVIGALLNVFVWIGYLSSAVNPLVYTLFNKTYR  
SAFSRYIQCYKENRKPLQLILVNTIPTLAYKSSQLQVGQKKNQEDAEPTANDCSMVTLGN  
QHSEEMCTDNIETVNEKVSCV

>MmHtr2b-NP\_032337.2

MASSYKMSEQSTTSEHILQKTCDHILITNRSGLETDSVAEEMKQTVGQGHVHWAALLILA  
VIIPTIGGNILVILAVALEKRLQYATNYFLMSLAIADLLVGLFVMPIALLTIMFEAIWPLPLALCPA  
WFLDVLVSTASIMHLCAISLDRYIAIKKPIQANQCNSRATAFIKITVVWLISIGIAIPVPIKGIETD  
VINPHNVTCELTKDRFGSFMVFGSLAAFFAPLTIMVVTYFLTIHTLQKKAYLVKNKPPQRLTR  
WTVPTVFLREDSFSSEKVAMLDGSHRDKILPNSSDETLMRMSSVGKRSAQTISNEQRA  
SKALGVVFFLFLMWCPFFITNLTLALCDSCNQTTKLTLEIFVWIGYVSSGVNPLIYTLFNKTF  
REAFGRYITCNYRATKSVKALRKFSSTLCFGNSMVENSKFFTKHGIRNGINPAMYQSPMRLR  
SSTIQSSSIILLDTLLTENDGDKAEEQVSYI

>MmHtr2c-NP\_032338.3

MVNLGTAVRSLLVHLIGLLVWQFDISISPVAIVTDTFNSSDGGRLFQFPDGVQNWPAISIVI  
IIMTIGGNILVIMAVSMEKKLHNATNYFLMSLAIADMLVGLLVMPLSLLAILYDYVWPLPRYLCP  
VWISLDVLVSTASIMHLCAISLDRYVAIRNPIEHSRFSRSTKAIMKIAIWAISIGVSVPIVIGLR  
DESKVFNNTTCLVNDPNFVLIGSFVAFFIPLTIMVITYFLTIYVLRRTLMLLRGHTEEELRNIS  
LNFLKCCCKKGDEEENAPNPNPDQKPRRKKKEKRPRGTMQAINNEKKASKVLGIVFFVFLIM  
WCPFFITNILSVLCGKACNQKLMKLLNVFVWIGYVCSGINPLVYTLFNKIYRRAFVSKYLRCDY  
KPKDKPPVRQIPRVAATALSGRELNVNIYRHTNERVVRKANDTEPGIEMQVENLELVPNPSN  
VVSERISSV

>MmHtr4-NP\_032339.2

MDKLDANVSSNEGFRSVEKVVLLTFLAVVILMAILGNLLVMVAVCRDRQLRKIKTNYFIVSLAF  
ADLLVSVLVMPFGAIELVQDIWAYGEMFCLVRTSLDVLLTTASIFHLCCISLDRYAICQQLV  
YRNKMTPLRIALMLGGCWVLPFISFLPIMQGWNNIGIVDVIEKRKFSHNSNSTWCVFMVNK  
PYAITCSVAFYIPFLMLVAYYRIYVTAKEHAQQIQMLQRAGATSESRPQPADQHSTHRMRT

ETKAAKTLCVIMGCFCFCWAPFFVTNIVDPFIDYTVPEQVWTAFLWLGYINSGLNPFLYAFLN  
KSFRAFLIILCCDDERYKRPPILGQTVPCSTTTINGSTHVL RDTVECGGQWESRCHLTATSP  
LVAAQPSDT

>MmHtr5a-NP\_032340.2

MDLPVNLTFSLSLSTPSSLEPNRSLDTEVLRPSRPFLSAFRVLVLTLLGFLAAATFTWNLLVLAT  
ILKVRTFHRVPHNLVASMAISDVLVAVLVMPLSLVHELSGRRWQLGRRRLCQLWIACDVLCT  
ASIWNVTAIALDRYWSITRHLEYTLRTRKRVSVMILLTWALSTVISLAPLLFGWGETYSEPS  
ECQVSREPSYTVFSTVGAFYLPLCVLFFVYWKIYRAAKFRMGSRKTNSVSPVPEAVEVKNAT  
QHPQMVFTRHATVTFQTEGDTWREQKEQRAALMVGILIGVFVLCWFPPFVTELISPLCSW  
DVPAIWKSIFLWLGYNSFFNPLIYAFNRSYSSAFKVFFSKQQ

>MmHtr5b-P31387.1

MEVSNLSGATPGLAFPPGPESCS DSPSSGRSMGSTPGGLILPGREPPFSAFTVLVVTLLVLLI  
AATFLWNLLVLVTILRVRAFHRVPHNLVASTAVSDVLVAVLVMPLSLVSELSAGRRWQLGRS  
LCHVWISFDVLCCTASIWNVAAIALDRYWTITRHLQYTLRTRSRASALMIAITWALSALIALAPL  
LFGWGEAYDARLQRCQVSQEPSYAVFSTCGAFYLPLAVLFFVYWKIYKAAKFRFRRRRAV  
VPLPATTQAKEAPPESEMVFARRRATVTFQTS GDSWREQKEKRAAMMVGILIGVFVLCWIP  
FFLTELISPLCACSLPPIWKSIFLWLGYNSFFNPLIYAFNKNYNNAFKSLFTKQR

>MmHtr6-NP\_001364025.1

MVPEPGPVNSSTPAWGP GPPPAPGGSGWVAAALCVVIVLTAAANSLIALICTQPALRNTSN  
FFLVSLFTSDLMVGLVVMPPAMLNALYGRWV LARGLCLLWTAFDVMCCSASILNCLISLDR  
YLLILSPLRYKLRMTAPRALALILGAWSLAALASFLPLLLGWHEL GKARTSAPGQCRLLASLPY  
VLV ASGVTFFLPSGAICFTYCRILLAARKQAVQVASLTTGTATAGQALET LQVPRTPRPGMES  
ADSRRLTTKHSRKALKASLTLGILLSMFFVTWLPFFVASIAQAVCDCISPGLFDVLTWLG YCN  
STMNPIIYPLFMRDFKRALGRFVPCVHCPPEHRASPASPSMWTSHSGARPGLSLQQVLP  
LPPNSDSDSASGGTSGLQLTAQ LLLPGEATR DPPPPTRAPTVVNFVTD SVEPEIRQHPLGS  
PMN

>MmHtr7-NP\_032341.2

MMDVNSSGRPDLYGHLRSLILPEVGRRLQDLSPDGGAHSVSSWMPHLLSGFPEVTASPA  
PTWDAPPD NVSGCGEQIN YGRVEKVVIGSILTLITLLTIAGNCLVVISVCFVKKLRQPSNYLIVS  
LALADLSVAVAVMPFVSVDLIGGKWIFGHFFCNVFIAMDVMCCTASIMTLCVISIDRYLGITR  
PLTYPVRQNGKCMAMILSVWLLSASITLPPLFGWAQNVNDDKVCLISQDFGYTIYSTAVAFY  
IPMSVMLFMYQIYKAARKSAAKHKFSGFPRVQPESVISLNGVVKLQKEVEECANLSRLLKH  
ERKNISIFKREQKAATTLGIIVGAFTVCWLPFFLLSTARPFICGTSCSCIPLWVERTCLWLGYA  
NSLINPFIYAFFNRDLRTTYRSL LQCQYRNINRKL SAAGMHEALKLAERPERSEFVLQNC DHC  
GKKGHDT

>MmDrd1-NP\_001278730.1

MAPNTSTMDETGLPVERDFSFRLTACFLSLLILSTLLGNTLVCAA VIRFRHLRSKVTNFFVISL  
AVSDLLVAVLVMPWKAVAEIAGFWPFGSFCNIWVAFDIMCSTASILNLCVISVDRYWAISSPF  
QYERKMTPKAAFILISVAWTL SVLISFIPVQLSWHKAKPTWPLDGNFTSLEDAEDDNC DTRLS  
RTYAISSSLISFYIPVAIMIVTYTSIYRIAQKQIRRISALERA AVHAKNCQTTTGNNGNPVECSQSE  
SSFKMSFKRETKVLKTL SVIMGVFVCCWLPFFISNCMV PFCGSEETQPF CIDSITFDVFWFG  
WANSSLNPIIYAFNADFQKAFSTLLGCYRLCPTTNNAIETVSINNGAVMFSSHHEPRGSISK  
DCNLVYLIPHAVGSS EDLKREEAGGIPKPLEKLS PALS VILDYD TDVSLEKI QPVTHSGQHST

>MmDrd2-NP\_034207.2

MDPLNLSWYDDDLERQNWSRPFNGSEGKPD RPHYNYAMLL TLLIFIIVFGNVLV CMAVSRE  
KALQTTTNYLIVSLAVADLLVATLVMPWVVYLEV VGEWKFSRIHCDIFVTL DVMCTASILNLC  
AISIDRYTAVAMPMLYNTRYSSKRRVTVMIAI VVLSFTISCPLL FGLNNTDQNECIANPAFVV  
YSSIVSFYVPFIVTLLVYIKIYIVLRKRRKRVN TKRSSRAFRANLKTPLKGNCTHPEDMKLCTVI  
MKSNGSFPVNRRRMDAARRAQELEM EMLSSTSPPERTRY SPIPPSHHQLTLPDP SHHGLH  
SNPDSPAKPEKNGHAKIVNPRIAKFFEIQTMPNGK TRTSLKTMSRRKLSQQKEKKATQMLAIV  
LGVFIICWLPFFITHILNIHCDCNIPPVLYSAFTW LGYVNSAVNPIIYTTFNIEFRKAFMKILHC

>MmDrd3-NP\_031903.1

MAPLSQISSHINSTCGAENSTGVNRARPHAYY ALSYCALILAIIFGNGLVCAA VLRERALQTTT  
NYLVVSLAVADLLVATLVMPWVVYLEVTGGVWNFS RICCDVFTLDVMMCTASILNLCAISID  
RYTAVVMPVHYQHGTGQSSCRRVALMITAVVWLAFAV SCPLLFGFNTTGDPSICSISNPDFVI  
YSSVVSFYVPFGVTVLVYARIYMLVRQRRRKRIL TRQNSQCISIRPGFPQQSSCLRLHPIRQF  
SIRARFLSDATGQMEHIEDKYPYPQKCQDPLL SHLQPLSPGQTHGELKRYYSICQDTALRHPN  
FEGGGGMSQVERTRNSLSPTMAPKLSLEVRKLSNG RLSTSLKLGPLQPRGVPLREKKATQM  
VVIVLGAFIVCWLPFFLTHVLNTHCQACHVSP ELYRATTWLG YVNSALNPVIYTTFNIEFRKAF  
LKILSC

>MmDrd4-NP\_031904.1

MGNSSATEDGGLLAGRGPESLGTGAGLGGAGAAALVGGVLLIGLVLAGNSLVCVSVASERT  
LQTPTNYFIVSLAAADLLLAVLVLPFLVYSEVQGGVWLLSPRLCDTLMAMDVMLCTASIFNLC  
AISVDRFVAVTVPLRYNQGGQCQLLLIAATWLLSAAVASPVVCGLNDVPGRDPAVCCLENRD  
YVVYSSVCSFFLPCPLMLLLYWATFRGLRRWEAARHTKLHSRAPRRPSGPGPPVSDPTQG  
PFFPDCPPPLPSLRTSPSDSSRPESELSQRPCSPGCLLADAALPQPPEPSSRRRRGAKITGR  
ERKAMRVLVVVGAFLVCWTPFFVWHITRALCPACFVSPRLVSAVTWLG YVNSALNPIIYTIF  
NAEFRSVFRKTLRLRC

>MmDrd5-NP\_038531.1



MLPPGRNGTAHRARLGLQRQLAQVDAPGGSAAPLGAQVVTAGLLTLLIVWTLLGNVLVCA  
AIVRSRHLRAKMTNIFIVSLAVSDFVALLVMPWKAVAEVAGYWPFGAFCDIWVAFDIMCSTA  
SILNLCIISVDRYWAISRPFYERKMTQRVALVMVALAWTLSILISFIPVQLNWHRDKAGSQGR  
EGLLSNETPWEEGWELDGRTENCDSLNRTYAISSSLISFYIPVAIMIVTYTRIIYRIAQVQIRRI  
SSLERAAEHAQSCRSRGACEPDPSLRASIKKETKVFKTLSVIMGVFVCCWLPFFILNCMVPF  
CSSGDAQGPRTGFPCVSETTFDIFVWFGWANSSLNPIIYAFNADFRKVFAQLLGC SHLCFRT  
PVQTVNISNELISYNQD TVFHREIAAAAYVHMIPNAVSSGDREVGEEEEAE EEPFDHMSQISP  
TTPDGD LAAESVWELDCEEEVSLGKISPLTPNCFHKTA

>MmHrh1-NP\_001239571.1

MSLPNTSSASEDKMCEGNRTAMASPQLLPLVVVLSISLVTVGLNLLVLYAVRSEKLTHTVG  
NLYIVSLSVADLIVGAVVMPMNILYLIMTKWSLGRPLCLFWLSMDYVASTASIFSVFILCIDRYR  
SVQQPLRYLRYRTKTRASATILGAWFLSFLWVIPILGWHHFTPLAPELREDKCE TDFYNVTW  
FKIMTAIINFYLPTLLMLWFYVKIYKAVRRHCQHRQLTNGSLPTFLEIKLRSEDAKEGAKKPGK  
ESPWGVQKRPSRDPTGGLDQKSTSEDPKVTSPVFSQEGERETVTRPCFRLDVMQTQPVP  
EGDARGSKANDQTLSQPKMDEQSLSTCRRIS ETS EDQTLVDRQSFSRRTTDS DTSIEPGLGK  
VKARSRSNSGLDYIKVTWKRLRSHSRQYVSGLHLNRERKAAKQLGCIMAAFILCWIPYFIFFM  
VIAFCNSCCSEPVHMFTIWLGYINSTLNPLIYPLCNENFKKTFKKILHIRS

>MmHrh2-NP\_001010973.1

MEPNGTVHSCCLDSIALKV TISVVLTTLIFITVAGNVVCLAVSLNRRLRSLTNC FIVSLAATDL  
LLGLLVMPFSAIQLSFKWSFGQVFCNIY TSLDVMLCTASILNLFMISLDRYCAVTDPLRYPVL  
VTPVRVAISLVFIWVISITLSFLSIHLGWNSRNGTRGGNDTFKCKVQVNEVYGLVDGMVTFYL  
PLLIMCVTYRIFK IAREQAKRINHIS SWKAATIREHKATVTLAAVMGAFIVCWFPYFTAFVYR  
GLRGDDAVNEVVEGIVLWLGYANSALNPILYATLNRDFRMAYQQLFHCKLASHNSHKTSLRL  
NNSLLSRSQSREGRWQEEKPLKLQVWSGTELTHPQGSPVRTRLSHSSCLLSL SLLSFIWKL  
GTWIHHRPFPQPSLHISA

>MmHrh3-NP\_598610.1

MERAPPDGLMNASGALAGEAAAAGGARGFSAAWTA VLAALMALLIVATVLGNALVMLAFVA  
DSSLRTQNNFFLLNLAISDFLVGAFCIPLYVPYVLTGRWTFGRGLCKLWLVDYLLCASSVFN  
IVLISYDRFLSVTRAVSYRAQQGDTRRAVRKMALVWVLAFLLYGPAILSWEYLSGGSS IPEGH  
CYAEFFYNWYFLITASTLEFFTPFLSVTFNLSIYLNQRRLRLDGGREAGPEPPPDAQPSP  
PPAPPSCWGCWPKGHGEAMPLHRYGVGEAGPGVETGEAGLGGGSGGGAAASPTSSSGS  
SSRGTERPRSLKRGSKPSASSASLEKRMKMVSQSITQRFRLSRDKKVAKSLAIIVSIFGLCWA  
PYTLLMIIRAACHGHCVDPDYWYETSFWLLWANS AVNPVLYPLCHYSFRRAFTKLLCPQKLKV  
QPHGSLEQCWK

>MmHrh4-NP\_694727.1

MSESNSTGILPPAAQVPLAFLMSSFAFAMVGNVILAFVVDNRNLRHRSNYFFLNLAISDFLV  
GLISIPLYIPHVLFNWNFGSGICMFWLITDYLLCTASVYNIVLISYDRYQSVSNAVSYRAQHTGI  
MKIVAQMVAWVWILAFVNGPMILASDSWKNSTNTKDCPEGFVTEWYILTITMLLEFLLPVISVA  
YFNVQIYWSLWKRRALSRCPSHAGFSTTSSSASGHLHRAGVACRTSNPGLKESAASRHSES  
PRRKSSILVSLRTHMNSSITAFKVGSFWRSESAALRQREYAELLRGRKLARSLAILLSAFAIC  
WAPYCLFTIVLSTYPRTERPKSVWYSIAFWLQWFNSFVNPFLYPLCHRRFQKAFWKILCVTK  
QPALSQNQSVSS

>MmAdra1a-NP\_001258689.1

MVLLSENASEGSNCTHPPAQVNISKAILLGVILGGLIIFGVLGNILVILSVACHRHLSVTHYYIV  
NLAVADLLLTSTVLPFSAIFEILGYWAFGRVFCNIWAAVDVLCCTASIMGLCIISIDRYIGVSYPL  
RYPTIVTQRRGVRALLCVWALSIVISIGPLFGWRQQAPEDETICQINEEPGYVLFSAIGSFYV  
PLTIILVMYCRVYVAKRESRGLKSGDKTDKSDSEQVTLRIHRKNVPAEGSGVSSAKNKTHFS  
VRLKFSREKKAATLGIVVGCFLCWLPFFLVMPIGSFFPNFKPPETVFKIVFWLGYLNSCIN  
PIIYPCSSQEFKAFQNVLRICLRRRQSSKHALGYTLHPPSQAVEGQHRGMVRIPVGSGET  
FYKISKTDGVREWKFFSSMPQGSARITMPKDQSACTTARVRSKSFLQVCCCVGSSTPRPEE  
NHQVPTIKIHTISLGENGEEV

>MmAdra1b-P97717.2

MNPDLDTGHNTSAPAHWGELKDANFTGPNQTSSNSTLPQLDVTRAVISVGLGAFILFAIVGNI  
LVILSVACNRHLRTPNTYFIVNLAIADLLLSFTDLPFSAITLVLGYWVLGRIFCDIWAAVDVLC  
TASILSLCAISIDRYIGVRYSLQYPTLVTRRKAILALLSVWVLSTVISIGPLLGWKEPAPNDDKE  
CGVTEEPFYALFSSLGSFYIPLAVILVMYCRVYVAKRTTKNLEAGVMKEMSNSKELTRIHSK  
NFHEDTSSSTKAKGHNPRSSIAVKLFKFSREKKAATLGIVVGMFILCWLPFFIALPLGSLFST  
LKPPDAVFKVFWLGYFNLSCLNPIIYPCSSKEFKRAFMRILGCQCRGRRRRRRRRRLGACA  
YTYRPWTRGGSLERSQSRKDSLDDSGSCMSGSQRTLPSASPSPGYLGRGTQPPVELCAFP  
EWKPGALLSLPEPPGRRGRLDGSGPLFTFKLLGEPESPGTEGDASNGGCDTTTTDLANGQPG  
FKSNMPLAPGHF

>MmAdra1d-P97714.1

MTFRDILSVTFEGPRASSSTGGSGAGGGAGTVGPEGPAVGGVPGATGGSAAVGTGSGED  
NQSSTAEEAGAAASGEVNGSAAVGGGLVVSAAQGVGVFLAAFILAVAGNLLVILSVACNRHL  
QTVTNYFIVNLAVADLLLSAAVLPFSATMEVLGFWPFGRFTCDVWAAVDVLCCTASILSLCTI  
SVDRYVGVHRSLKYPAMTERKAAAILALLWAVALVSVGPLLGWKEPVPDERFCGITEEV  
GYAIFSSVCSFYLPMAVIVVMYCRVYVVARSTTRSLEAGIKREPGKASEVVLRIHCRGAATSA  
KGNPGTQSSKGHTLRSSLSVRLKFSREKKAATLAIVGVFVLCWFPPFFVLPLGSLFPQLK  
PSEGVFVIFWLGYFNLCVNPPIIYPCSSREFKRAFLRLLRCQCRRRRRRRLWPSLRPPLASLD  
RRPALRLCPQPAHRTPRGSPSPHCTPRPGLRRHAGGAGFGLRPSKASLRLREWRLGPLQ  
RPTTQLRAKVSSLSHKFRSGGARRAETACALRSEVEAVSLNVPQDGAEVICQAYEPGDLS

NLRETDI

>MmAdra2a-NP\_031443.4

MGSLQPDAGNSSWNGTEAPGGGTRATPYSLQVTLTLVCLAGLLMLFTVFGNVLVIIAVFTSR  
ALKAPQNLFLVSLASADILVATLVIPFLANEVMGYWYFGKVVCEIYLALDVLFACTSSIVHLCAI  
SLDRYWSITQAIEYNLKRTPRRIKAIIVTVWVISAVISFPPLISIEKKGAGGGQQAEPSCIND  
QKWYVISSSIGSFAPCLIMILVYVRIYQIAKRRTRVPPSRGPDACSAPPGGADRRPNGLGP  
ERGAGPTGAEAEPLPTQLNGAPGEPAPAGPRDGDALDLEESSSEHAERPPGPRRPDRGP  
RAKGTKRASQVKPGDSLPRRPGAAGPGASGSGHGEERGGGAKASRWRGRQNREKRFT  
FVLAVVIGVFVVCWFPFFFTYTLIAGCPVPSQLFNFFFWFGYCNSSLNPVIYTIFNHDFRRAF  
KKILCRGDRKRIV

>MmAdra2b-NP\_033763.3

MVHQEPYSVQATAAIASAITFLILFTIFGNALVILAVLTSRSLRAPQNLFLVSLAAADILVATLIIPF  
SLANELLYWYFWRAWCEVYLALDVLFACTSSIVHLCAISLDRYWAVSRALEYNSKRTPRRIK  
CIILTVWLIAAVISLPLIYKGDQRPEPHGLPQCELNQEAWYILASSIGSFAPCLIMILVYLRIVY  
IAKRSHCRGLGAKRSGEGESKKPRPGPAAGGVPASAKVPTLVSPSSVGEANGHPKPPR  
EKEEGETPEDPEARALPPNWSALPRSVQDQKKGTSGATAEKGAEEDEEEVEECEPQTLPA  
SPASVFNPLQQPQTSRVLATLRGQVLLSKNVGVASGQWRRRTQLSREKRFTFVLAVVIG  
VFVVCWFPFFFSYSLGAICPQHCKVPHGLFQFFFWIGYCNSSLNPVIYTIFNQDFRRAFRRIL  
CRQWTQTGW

>MmAdra2c-NP\_031444.2

MASPALAAALAAAAEGPNGSDAGEWGS GGANASGTDWVPPPGQYSAGAVAGLAAVVG  
FLIVFTVGNLVLVIAVLT SRALRAPQNLFLVSLASADILVATLVMPFLANELMAYWYFGQV  
WCGVYLALDVLFACTSSIVHLCAISLDRYWSVTQAVEYNLKRTPRRVKATIVAVWLISAVISFPP  
LVSFYRRPDGAAYPQCGLNDETWYILSSCIGSFAPCLIMGLVYARIYRVAKLRTRTLSEKRG  
PAGPDGASPTTENGLGKAAGENGHCAPPRTEVEPDESSAAERRRRRGALRRGGRRREGA  
EGDTGSADGPGPLAAEQGARTASRSPGPGGRLSRASSRSVEFFLSRRRRRARSSVCRRKV  
AQAREKRFTFVLAVVMGVFVLCWFPFFFSYSLYGICREACQLPEPLFKFFFWIGYCNSSLNP  
VIYTVFNQDFRRSFKHILFRRRRRGFRQ

>MmAdrb1-NP\_031445.2

MGAGALALGASEPCNLSSAAPLPDGAATAARLLVLASPPASLLPPASEGSAPLSQQWTAGM  
GLLLALIVLLIVGNLVLVIVAIKTPRLQTLTNLFIMSLASADLVMGLLVVPGATIVVWGRWEY  
GSFFCELWTSVDVLCVTASIELCVIALDRYLAITSPFRYQSLLTRARARALVCTVWALSALVS  
FLPILMHWWRAESDEARRCYNDPKCCDFVTNRAYAIASSVVSFYVPLCIMA FVYLRVFREAQ  
KQVKKIDSCERRFLGGPARPPSPEPSPSPGPPRPADSLANGRSSKRRPSRLVALREQKALK  
TLGIIMGVFTLCWLPFFLANVVKAFHRDLVDPRLFVFFNWLYANSANFPIIYCRSPDFRKA

QRLLCCARRAACRRRAAHGDRPRASGCLARAGPPPSPGAPSDDDDDDAGTTPARLLEP  
WTGCNNGGTTTVDSDSLDEPGRQGFSSSESKV

>MmAdrb2-NP\_031446.2

MGPHGNDSDFLAPNGSRAPDHDVTQERDEAWVVGMAILMSVIVLAIVFGNVLVITAIKFER  
LQTVTNYFIISLACADLV MGLAVV PFGASHILMKMWNFGNFWCEFWTSIDVLCVTASIE TLCVI  
AVDRYVAITSPFKYQSLLTKNKARVVILMVWIVSGLTSFLPIQMHWYRATHKKAIDCYTEETC  
CDFFTNQAYAIASSIVSFYVPLVVMVFVYSRVFQVAKRQLQKIDKSEGRFHAQNLSQVEQDG  
RSGHGLRRSSKFCLKEHKALKTLGIIMGTFTLCWLPFFIVNIVHVIRDNLIPKEVYILLNWLGYV  
NSAFNPLIYCRSPDFRIAFQELLCLRRSSSKTYGNGYSSNSNGRTDYTGEPNTCQLGQERE  
QELLCEDPPGMEGFVNCQGTVP SLSVDSQGRNCSTNDSPL

>MmAdrb3-NP\_038490.2

MAPWPHRNGSLALWSDAPTLDPSAANTSGLPGVPWAAALAGALLALATVGGNLLVIIAIART  
PRLQTITNVFVTSLAAADLVVGLLVMPGATLALTGHWPLGETGCELWTSVDVLCVTASIE TL  
CALAVDRYLAVTNPLRYGTLVTKRRARA AAVLVWIVSAAVSFAPIMSQWWRV GADAEAEQEC  
HSNPRCCSFASNMPYALLSSSVSFYLP LLVMLFVYARV FVVAKRQRHLLRRELGRFSPEESP  
PSPSRSPSPATGGTPAAPDGVPPCGRRPARLLPLREHRALRTLGLIMGIFSLCWLPFFLANV  
LRALAGPSLVPSGVFIALNWLGYANS AFNPVIYCRSPDFRDAFRLLCSYGGRGPEEPRAVT  
FPASPVEARQSPPLNRFDGYEGARPFPT

>MmChrm1-NP\_001106167.1

MNTSVPPAVSPNITVLAPGKGPWQVAFIGITGLLSLATVTGNLLVLISFKVNTTELKTVN NYFL  
LSLACADLIIGTF SMNLYTTYLLMGHWALGTLACDLWLALDYVASNASVMNLLLI SFDRYFSV  
TRPLSYRAKRTPRRAALMIGLAWLV SFVLWAPAILFWQYLVGERTVLAGQCYIQFLSQPIITF  
GTAMAAFYLPVTVMCTLYWRIYRE TENRARELAALQGSETPGKGGGSSSSSERSQPGAEG  
SPESPGRCCRCCRAPRLQAYS WKEEEEEDEGSMESLTSSEGE EEPGSEVVIKMPMVDPE  
AQAPTKQPPKSSPNTVKRPTKKGRDRGGKGQKPRGKEQLAKRKTFSLVKEKKAARTLSAIL  
LAFILTWTPYNIMVLVSTFCKDCVPETLWELGYWLCYVNSTVNPMCYALCNKAFRDTFRLLLL  
CRWDKRRWRKIPKRPGSVHRTPSRQC

>MmChrm2-NP\_987076.2

MNNSTNSSNGLAITSPYKTFEVFIVLVAGSLSLVTIIGNILVMVSIKVN RHLQTVN NYFLFSL  
ACADLIIGVFSMNLYTLYTVIGYWPLGPVVC DLWLALDYVVSNASVMNLLIISFDRYFCVTKPL  
TYPVKRTTKMAGMMIAAAWVLSFILWAPAILFWQFIVGVRTVEDGECYIQFFSNAAVTFGTAI  
AAFYLPVIIMTVLYWHISRASKSRIKKEKKEPVANQDPVSPSLVQGRIVKPNNNNMPGGDGG  
LEHNKIQNGKAPRDGGTENCVQGE EKESSNDSTSVSAVASNMRDDEITQDENTVSTSLGHS  
KDDNSRQTCIKIVTKTQKGD ACTPTSTTVELVGSSGQNGDEKQNI VARKIVKMTKQPAKKKP  
PPSREKKVTRTILAILLAFIITWAPYNVMVLINTFCAPCIPNTVWTIGYWLCYINSTINPACYALC

NATFKKTFKHLLMCHYKNIGATR

>MmChrm3-NP\_150372.1

MTLHSNSTTSPLFPNISSSWVHSPSEAGLPLGTVSQLDSYNISQTSGNFSSNDTSSDPLGGH  
TIWQVVFIAFLTGFALVTIIGNILVIVAFKVNKQLKTVNNYFLLSLACADLIIGVISMNLFTTYIIM  
NRWALGNLACDLWLSIDYVASNASVMNLLVISFDRYFSITRPLTYRAKRTTKRAGVMIGLAW  
VISFVLWAPAILFWQYFVGKRTVPPGECFIQFLSEPTITFGTAIAAFYMPVTIMTILYWRIYKET  
EKRTKELAGLQASGTEAEAENFVHPTGSSRSCSSYELQQQGTKRSSRRKYGGCHFVFTTK  
SWKPSAEQMDQDHSSSDSWNNNDAAASLENSASSDEEDIGSETRAIYSIVLKLPGHSTILNS  
TKLPSSDNLQVPDKDLGTMDVERNAHKLQAQKSMDDRNCQKDFSKLPIQLESADVDTAKTS  
DTNSSVDKTTAALPLSFKEATLAKRFALKTRSQITKRKRMSLIKEKAAQTL SAILLAFIITWTP  
YNIMVLVNTFCDSICIPKTYWNLGYWLCYINSTVNPVCYALCNKTFRTTFKMLLLCQCDKRKR  
RKQQYQQRQSVIFHKRVPEQAL

>MmChrm4-XP\_006498717.1

MANFTPVNGSSANQSVRLVTTAHNHLETVEMVFIATVTGSLSLVTVVGNILVMSIKVNRQLQ  
TVNNYFLFLACADLIIGAFSMNLYTLIYIKGYWPLGAVVCDLWLALDYVVSNASVMNLLIISFD  
RYFCVTKPLTYPARRTTKMAGLMIAAAWVLSFVLWAPAILFWQFVVGKRTVPDNQCQFIQFLS  
NPAVTFGTAIAAFYLPVVIMTVLYIHISLASRSRVHKHRPEGPKEKKAKTLAFLKSPLMKPSIKK  
PPPGGASREELRNGKLEEAPPPALPPPPRPVADKDTSNESSSGSATQNTKERPPTELSTTE  
AATTPALPAPTLQPRTLNPASKWSKIQIVTKQTGSECVTAIEIVPATPAGMRPAANVARKFASI  
ARNQVRKKRQMAARERK/VRTIFAILLAFILTWTPYNVMVLVNTFCQSCIPERVWSIGYWLCY  
VNSTINPACYALCNATFKKTRHLLLCQYRNIGTAR

>MmChrm5-NP\_991352.2

MEGESYHNETTVNGTPVNHQALERHGLWEVITIAAVTAVVSLMTIVGNVLMISFKVNSQLKT  
VNNYLLSLACADLIIGIFSMNLYTTYILMGRWVLGSLACDLWLALDYVASNASVMNLLVISFD  
RYFSITRPLTYRAKRTPKRAGIMIGLAWLVSFILWAPAILCWQYLVGKRTVPPDECQIQFLSEP  
TITFGTAIAAFYIPVSVMTILYCRIYRETEKRTKDLADLQGSDSVAEVKKRKPARTLLRSFFSC  
PRPSLAQRVRNQASWSSSRSTSTTGKPTQATDLSADWEKAEQVTCSSCPSEDEAKAT  
TDPVFQVVKNEAKESPGKEFNTQETKETFVSPRTENNDYDTPKYFLSPGAAHRLKSQKCV  
AYKFRLVVKADGTQETNNGCRKVKIMPCSFVSKDPSTKGLDPLSHQMTKRKRMLVVKER  
KAAQTL SAILLAFIITWTPYNIMVLVSTFCDKCVPVTLWHLGYWLCYVNSTINPICYALCNRTF  
RKTFKLLLLCRWKKKKVEEKLYWQGNSKLP
